1 Title

2 Assembly and seasonality of core phyllosphere microbiota on perennial biofuel crops

3

4 Authors

5 Keara L Grady<sup>1,2,a</sup>, Jackson W. Sorensen<sup>1,2,a</sup>, Nejc Stopnisek<sup>2,3,a</sup>, John Guittar<sup>1,4</sup>, and Ashley

6 Shade<sup>1,2,3,5,6\*</sup>

7

8 1. Department of Microbiology and Molecular Genetics, Michigan State University, East

9 Lansing MI 48840 USA

10 2. The DOE Great Lakes Bioenergy Research Center, Michigan State University, East

11 Lansing, MI 48840

12 3. Program in Ecology, Evolutionary Biology and Behavior, Michigan State University, East

13 Lansing MI 48840

14 4. Kellogg Biological Station, Michigan State University, Hickory Corners, MI 43060

15 5. The Plant Resilience Institute, Michigan State University, East Lansing MI 48840

16 6. Department of Plant, Soil and Microbial Sciences, Michigan State University, East

17 Lansing MI 48840

18

19 <sup>a</sup>Contributed equally

20 \*correspondence, shadeash@msu.edu

21

22 Keywords

- 23 Miscanthus, switchgrass, temporal dynamics, microbiome, agroecosystems, bioenergy,  
24 sustainability, plant-microbe interactions, leaf, phytobiome  
25

26 Abstract

27 **Perennial grasses are promising feedstocks for biofuel production, and there is potential to**  
28 **leverage their native microbiomes to increase their productivity and resilience to**  
29 **environmental stress. Here, we characterize the 16S rRNA gene diversity and seasonal**  
30 **assembly of bacterial and archaeal microbiomes of two perennial cellulosic feedstocks,**  
31 **switchgrass (*Panicum virgatum* L.) and miscanthus (*Miscanthus x giganteus*). We sampled**  
32 **leaves and soil every three weeks from pre-emergence through senescence for two**  
33 **consecutive switchgrass growing seasons and one miscanthus season, and identified core leaf**  
34 **taxa based on abundance and occupancy. Virtually all leaf taxa are also detected in soil;**  
35 **source-sink modeling shows non-random, ecological filtering by the leaf, suggesting that soil**  
36 **is important reservoir of phyllosphere diversity. Core leaf taxa include early, mid, and late**  
37 **season groups that were consistent across years and crops. This consistency in leaf**  
38 **microbiome dynamics and core members is promising for microbiome manipulation or**  
39 **management to support biofuel crop production.**

40 The phyllosphere (aerial parts of plants) represents the largest environmental surface  
41 area of microbial habitation on the planet <sup>1-3</sup>, and much of that surface area is cultivated  
42 agriculture, including an estimated  $1.5 \times 10^7$  km<sup>2</sup> of cropland <sup>4</sup>. Phyllosphere microorganisms  
43 may provide numerous benefits to plants, including increased stress tolerance <sup>5-7</sup>, promotion of  
44 growth and reproduction <sup>8-10</sup>, protection from foliar pathogens <sup>11</sup>, and, with soil microbes,  
45 control of flowering phenology <sup>12</sup>. Phyllosphere microorganisms are also thought to play  
46 important roles in Earth's biogeochemical cycles by moderating methanol emissions from  
47 plants <sup>13,14</sup> and contributing to global nitrogen fixation <sup>15</sup>. Despite this importance, knowledge

48 of phyllosphere microbiomes remains relatively modest, especially for agricultural crops<sup>3,16–18</sup>.  
49 To leverage plant microbiomes to support productivity and resilience both above and below  
50 ground<sup>19–21</sup>, there is a need to advance foundational knowledge of phyllosphere microbiome  
51 diversity and dynamics.

52 Biofuel crops like miscanthus and switchgrass are selected to have extended growing  
53 seasons, to produce ample phyllosphere biomass, and to maintain high productivity when  
54 grown on marginal lands that are not optimal for food agriculture<sup>22–25</sup>. In the field, these  
55 grasses provide extensive leaf habitat, with a seasonal maximum leaf area index (LAI) of 6.2 for  
56 switchgrass, and 10 m<sup>2</sup> leaf surface per m<sup>2</sup> land for miscanthus<sup>22</sup>, as compared to a maximum  
57 LAI of 3.2 for corn<sup>26</sup>. Upon senescence, the aboveground biomass is harvested for conversion  
58 to biofuels and related bioproducts. Improved understanding of the phyllosphere microbiome is  
59 expected to advance goals to predict or manage changes in biomass quality in response to  
60 abiotic stress like drought<sup>27–31</sup> or biotic stress like foliar pathogens<sup>32–34</sup>.

61 Leveraging the Great Lakes Bioenergy Research Center’s Biofuel Cropping System  
62 Experiment (BCSE; a randomized block design established at Michigan State’s Kellogg Biological  
63 Station in 2008), we asked two questions of the bacterial and archaeal communities  
64 (henceforth: “microbiomes”) inhabiting the leaf surfaces and the associated soils of switchgrass  
65 and miscanthus: 1) Are there seasonal patterns of phyllosphere microbiome assembly? If so,  
66 are these patterns consistent across fields of the same crop, different crops, and years? 2) To  
67 what extent might soil serve as a reservoir of phyllosphere diversity?

68

69 Results and Discussion

70 *Sequencing summary and alpha diversity*

71 In total, we sequenced 373 phyllosphere epiphyte (leaf surface) and soil samples across  
72 the two growing seasons in 2016 and 2017. The number of sequences per sample after our 97%  
73 OTU (operational taxonomic unit) clustering pipeline ranged from 20,647 to 359,553. The  
74 percentage of sequences belonging to chloroplasts and mitochondria per sample range  
75 between 0.2-99.8%, but 235 of the samples (63%) had fewer than 10% chloroplasts and  
76 mitochondria reads. After removing sequences that were attributed to chloroplasts and  
77 mitochondria or that had unassigned taxonomic classification, we filtered samples that  
78 contained fewer than 1000 reads and rarefied the remaining samples to 1000 reads for  
79 comparative analyses. While this number of reads is not sufficient to fully capture soil diversity,  
80 it does capture phyllosphere diversity (**Figure 1A**). The majority of the switchgrass and  
81 miscanthus phyllosphere communities were exhaustively sequenced, and approached richness  
82 asymptotes with their associated soils.

83 As reported for other plants<sup>3,35</sup>, switchgrass and miscanthus phyllosphere communities  
84 had relatively low richness, with 1480 total taxa observed across both crops and consistently  
85 fewer than 150 taxa per time point, though there was modest seasonal variability in richness  
86 (**Figure S1**). Cumulative richness increased most between the two earliest time points, and then  
87 tapered gradually upward until senescence (**Figure 1B**), showing that the contributions of new  
88 taxa to community richness were low but consistent over time.

89

90 *Seasonal microbiome dynamics*

91 To perform the most complete temporal analyses of phyllosphere microbiome  
92 seasonality, we also subsampled the amplicon sequencing dataset to include the maximum  
93 number of time points, resulting in inclusion of 51 discrete leaf and soil samples collected over  
94 18 total time points. The overarching patterns in beta diversity were consistent and statistically  
95 indistinguishable from those derived from the same dataset to include more reads per sample  
96 but fewer time points (Mantel tests all  $p < 0.001$ ; **Table S1, Table S2, Figure S2**). For  
97 consistency, we report the patterns from 1000 reads per sample in the main text, but for  
98 transparency and comparison, we report results from the minimum reads per sample, inclusive  
99 of the complete time series, in supporting materials.

100 There were directional seasonal changes in the structures of switchgrass and  
101 miscanthus phyllosphere bacterial and archaeal communities (**Figure 2A, Table 1**), and these  
102 could be attributed to changes in both soil and leaf properties, as well as to weather (**Table S3**).  
103 Over the 2016 season, miscanthus and switchgrass phyllosphere communities were  
104 synchronous (changed at the same pace and to the same extent, Procrustes  $m12 = 0.349$ ,  $R =$   
105  $0.807$ ,  $p = 0.021$ ), and community structure became less variable as the growing season  
106 progressed (**Figure S3**). Switchgrass 2016 and 2017 leaf communities were highly synchronous,  
107 suggesting a predictable, interannual assembly (Procrustes  $m12 = 0.011$ ,  $R = 0.994$ ,  $p = 0.008$ ).  
108 The switchgrass community structures were overall equivalent between 2016 and 2017, with  
109 the exception of the final time points that were collected post-senescence. Together with the  
110 species accumulation analysis (**Figure 1B**), these data suggest that these phyllosphere  
111 communities are not stochastically assembled, nor are they a linear accumulation over seasonal  
112 leaf exposure to whatever taxa are dispersed. The communities follow a directional assembly

113 over the growing season, and the assembly was highly consistent over two years in the  
114 switchgrass.

115

### 116 *Contribution of soil microorganisms to phyllosphere assembly*

117 The major sources of microorganisms to the phyllosphere are soils <sup>2</sup>, the vascular tissue  
118 of the plant or its seed <sup>36</sup>, and the atmosphere or arthropod vectors <sup>3</sup>. As several studies have  
119 shown that soil microbes contribute to the phyllosphere microbiome <sup>35,37</sup>, we wanted to  
120 understand the potential for soil as a reservoir of microorganisms inhabiting switchgrass and  
121 miscanthus phyllospheres. We hypothesized that the intersect of shared soil and phyllosphere  
122 taxa would be highest early in the season, after the young grasses emerged through the soil.  
123 Our deep sequencing effort also provided the opportunity to investigate differences in taxon  
124 relative abundances between soil and leaf communities, and to understand what contributions,  
125 if any, the soil rare biosphere has for leaf assembly.

126 First, we interrogated the 2016 time series to determine the influence of soil-detected  
127 taxa on leaf microbial communities for both crops. As expected, the structures of leaf  
128 communities were highly distinct from soils (**Figure 2B, Figure S2B, Table 1**). Though soil  
129 communities also changed seasonally, they experienced less overall change than the  
130 phyllosphere (**Table 1, Figure 2B, Figure S2C**). While fertilization had no impact on phyllosphere  
131 communities, it did have small but significant influence on soil communities (**Table 1**). These  
132 seasonal and fertilization treatment patterns were reproduced in 2017 for switchgrass (**Table**  
133 **1**).

134 To better understand the relationship between soil and phyllosphere communities,  
135 including the influence of rare members of the soil, we searched for phyllosphere taxa within  
136 the full soil dataset (not subsampled). Approximately 90% of phyllosphere OTUs were present  
137 in soil samples, with negligible differences between the two crops and modest variability over  
138 time (**Figure 3A**). When considering the relative abundances of taxa, the mean fraction of  
139 phyllosphere communities found in soil samples was even higher at 98% and exhibited no clear  
140 trend over time (**Figure 3B**). Our results show that the majority of abundant, commonly  
141 detected taxa in the phyllosphere are also present in the soil – albeit often at very low  
142 abundances (see below) – highlighting a potentially important role of the soil in harboring  
143 phyllosphere taxa between plant colonization events.

144 Given the large proportion of phyllosphere taxa present in the soil, we explored the  
145 potential role that immigration from the soil may have in shaping phyllosphere community  
146 composition and seasonal patterns. On balance, many abundant and persistent phyllosphere  
147 taxa were in low abundances in the soil, though there was a positive association between soil  
148 and leaf abundances for soil taxa  $> 1 \times 10^4$  relative abundance (**Figure 3C**). This result indirectly  
149 supports the presence of an ecological filter operating on the phyllosphere that favors some  
150 taxa while disfavoring others. To further investigate how ecological filtering may vary over the  
151 growing season, we compared observed trends in OTU richness with those predicted by a  
152 source-sink null model which simulated demographic stochasticity and random immigration  
153 from the soil between subsequent sampling points (see Methods, **Figure 3D-F**). Observed  
154 phyllosphere communities were dramatically less rich than null model predictions, again  
155 supporting the presence of a strong ecological filter. Such a filter could be due to host plant



156 selection, environmental filtering, competition exclusion among microbial taxa, or a  
157 combination of all three. According to this model, the strength of filtering did not trend  
158 consistently over the growing season.

159 Finally, other studies have found that soil microbes contribute more to early-season  
160 phyllosphere communities<sup>38</sup>, and we observed similar patterns: the most abundant soil taxa  
161 that were also detected on leaves were more prominent in the early season and then became  
162 rare and transient on leaves in the late season (**Figure S4**).

163 We conclude from these results that soil is a major reservoir of leaf microorganisms for  
164 these perennial crops and note that deep sequencing was required of the soils to observe many  
165 of the prominent leaf taxa. This is in contrast to the studies of other plants that have suggested  
166 that the phyllosphere is comprised largely of passively dispersed and stochastically assembled  
167 microbes from the atmosphere<sup>39–41</sup>. Notably, our analysis cannot inform directionality or  
168 mechanism of dispersal, which could have occurred between soil and leaf via wind, insects, or  
169 through grass emergence, etc. While 133 leaf OTUs (9%) observed in the phyllosphere could  
170 not be detected in the soil (using the unrarified soil dataset) and may be attributable to non-soil  
171 reservoirs, the vast majority of leaf microbes were detectable in local soils and non-neutral  
172 assembly patterns suggest both determinism and habitat filtering.

173

#### 174 *Core members of the switchgrass and miscanthus phyllosphere*

175 There was high overlap between switchgrass and miscanthus phyllosphere communities  
176 and a trend towards increased intra-crop similarity during senescence (**Figure S5**). There was  
177 also a modest influence of host crop in 2016 (**Table 1**). Therefore, we defined a core

178 microbiome for each crop and season (**Dataset 1**). We applied an established macroecological  
179 approach <sup>42</sup> to consider both the occupancy and abundance patterns of these taxa (**Figure 4A-**  
180 **C**); abundance-occupancy relationships have been previously explored for microbial  
181 communities <sup>43,44</sup> and we utilize it here for ecologically informing a core microbiome.  
182 *Occupancy* is an ecological term that considers how consistently a taxon is detected across  
183 samples in the dataset, expressed as a proportion of occurrences given the total samples  
184 collected (e.g., 1.0 or 100%). Occupancy provides a dataset-aggregated term describing taxon  
185 persistence, which can be informative for defining core taxa when datasets include a time  
186 series <sup>45</sup>.

187 In contrast to the taxa unique to crops and years, which were rare and not persistent,  
188 most of the highly abundant and prevalent taxa were shared (**Figure 4A-C**). We first quantified  
189 the abundance and occupancy distributions of OTUs, and then identified OTUs that were  
190 consistently detected across replicate plots at one sampling time (occupancy of 1) to include in  
191 the core. We found that these 44, 51 and 42 core taxa (as highlighted in **Figure 4A-C**) contribute  
192 84.4%, 79.5% and 79.4% to the total beta diversity in miscanthus 2016, switchgrass 2016 and  
193 2017, respectively (**Figure 4D-F**). While these core taxa were highly abundant and persistent on  
194 these crops' leaves, their functions are yet unknown and additional members could also  
195 transiently contribute. However, we suggest that the core taxa identified here should be  
196 prioritized for follow-up study of functionality and potential plant benefits.

197 Notably, if we had defined the core as those taxa uniquely detected on each crop (as in  
198 a Venn diagram analysis, **Figure S6**), we would have instead identified rare and transient taxa  
199 (**Figure 4A-C**). Thus, a core analysis based on presence and absence, instead of on abundance

200 and occupancy, would have provided a different, and arguably less ecologically relevant, core  
201 for these perennial crops. The approach used here provides a reproducible and conservative  
202 option for longitudinal series, and allows for systematic discovery<sup>46,47</sup> of a replicated core over  
203 time.

204 The core taxa included several Proteobacteria (*Methylobacterium*, *Sphingomonas*, and  
205 *Pseudomonas* spp.) and Bacteroidetes (*Hymenobacter* spp.). The taxonomic affiliations of these  
206 core taxa are consistent with the literature for other phyllosphere communities<sup>2,3,18,35,48,49</sup>,  
207 providing new support for their seasonal importance in the phyllosphere.

208 We then performed a hierarchical clustering analysis of standardized (e.g., z-score)  
209 dynamics to explore seasonal trends of core taxa (**Figure 4 G-I, Figure S7**)<sup>50</sup>. This analysis  
210 identified several discrete, seasonally-defined groups of core taxa in switchgrass and  
211 miscanthus, respectively. Seasonal groups were taxonomically consistent across crops and  
212 years (**Figure 4 J-L**). This finding suggests potential for functional redundancy because closely  
213 related taxa are hypothesized to have substantial overlap in their functional repertoire<sup>51</sup>. The  
214 early-season groups (**Figure S7, Figure 4G-I** red traces) included several *Gammaproteobacteria*  
215 (**Figure 4J-L**). The late-season groups (**Figure S7, Figure 4G-I** blue traces) was comprised of  
216 *Alphaproteobacteria* to *Cytophagia* and *Actinobacteria* and was pronounced in switchgrass  
217 (**Figure 4J-L**). The third groups (**Figure S7, Figure 4G-I** gray traces) included taxa that peaked in  
218 relative abundance mid-season, including *Alphaproteobacteria* and few taxa belonging to *Beta*-  
219 and *Gamma-proteobacteria*, *Cytophagia*, *Sphingobacteria* and *Actinobacteria* (**Figure 4J-L**).

220 Our data suggest a compensatory relationship between members within the  
221 Proteobacteria, where members of *Gammaproteobacteria* and *Alphaproteobacteria* replace

222 one another over time (**Figure 5A**). Such community transitions have been observed on the  
223 phyllosphere of crops such as sugarcane<sup>37</sup>, common beans, soybeans, and canola<sup>38</sup>. A study of  
224 endophytic bacteria of prairie grasses, including switchgrass, showed the same trend in  
225 abundance of *Gamma*- and *Alphaproteobacteria*<sup>52</sup> suggesting that these phyllosphere taxa are  
226 facultative endophytes or are similarly affected by the plant development. The benefits plants  
227 may gain from these taxa are well characterized (see review from<sup>53</sup>, however it remains  
228 unknown what drives the exclusion of *Pseudomonas* and gives rise to *Alphaproteobacteria*  
229 (predominantly *Methylobacteria*) in the phyllosphere and endosphere. One possible  
230 explanation would be nutrient availability regulated by the plant development which would  
231 selectively influence the abundances of these taxa. Delmotte and colleagues<sup>54</sup> hypothesized  
232 that *Pseudomonas* specialize on monosaccharides, disaccharides and amino acids, whereas  
233 *Sphingomonas* and *Methylobacteria* are generalist scavengers that can subsist on a variety of  
234 substrates present at low amounts.

235         Despite similarity in the membership and dynamics of the core microbiota on both crop  
236 plants, there were differences in the relative abundances of the same taxa across crops,  
237 suggesting some microbiome adaptation to or selectivity by the host plant (**Figure 5B**). There  
238 were other core OTUs that had consistent dynamics across both crops, but these examples  
239 demonstrate, first, that dynamics can be crop specific, and second, that abiotic filtering of an  
240 OTU to a particular crop could be manifested as differences in dynamics in addition to the more  
241 extreme scenarios of taxon exclusion or crop specificity that are the hypotheses posed given  
242 unique detection on a particular crop. Indeed, because the crop-unique taxa were generally  
243 rare and transient (**Figure 4A-C**), the dynamics of core taxa with crop-distinct dynamics may

244 harbor clues as to the competitive landscape and microbially important changes in the host leaf  
245 environment across crops.

246

247 *The contributions of abiotic variables, space, time, and crop on phyllosphere assembly*

248 We summarize our analyses of the contributions of crop (host plant), space, time, and  
249 abiotic variables to the assembly of the core phyllosphere community in order of least to most  
250 important. Spatial distance between the plots had no explanatory value (assessed by distance-  
251 decay of beta diversity using a Mantel test with a spatial distance,  $r: 0.013$ ,  $p = 0.256$ ). This  
252 finding is different from a recent study of annual crops (common beans, canola and soybean)  
253 that showed an influenced of sampling location on leaf microbiome structure<sup>38</sup>. Here, among  
254 those that variables were significant, crop (switchgrass or miscanthus) had the lowest  
255 explanatory value (**Table 1**). However, our work agrees with previous research that has shown a  
256 relationship between plant species/genotype and the leaf microbiota of perennial plants such  
257 as wild mustard<sup>55</sup>, sugar cane<sup>37</sup>, and tree species like birch, maple, and pine<sup>56</sup>. Time and  
258 measured abiotic factors had highest explanatory value (**Table 1**, **Table S3**). Relatedly, Copeland  
259 et al. 2015 showed that stage in plant development can influence leaf microbiome structure in  
260 annual crops.

261 To conclude, we investigated the assembly and seasonal dynamics of the phyllosphere  
262 and soil microbes of two perennial grasses, switchgrass and miscanthus, and found consistent  
263 community trajectories and memberships across growing seasons, suggesting that their key  
264 players are predictable and that most of them can be detected in associated soils.

265 Understanding the seasonal patterns of these key taxa could be used to improve biomass

266 production, plant health, or facilitate conversion. As seen in <sup>57</sup>, the introduction or control of a  
267 few key microbial species can have significant impact on the host plant phenotype. Next steps  
268 should be to interrogate core members for functionality and direct interactions with the plant,  
269 including investigations of the interactions among core members and with the host crop. This  
270 exploration lays the foundation for an approach to biofuel grass production that incorporates  
271 an understanding of host-microbe and microbe-microbe interactions.

272

273 Methods

274 *Site description & sampling scheme*

275 Our study system is located within the Great Lakes Bioenergy Research Center (GLBRC)  
276 Biofuel Cropping System Experiment (BCSE) in Hickory Corners, Michigan (42°23'41.6" N,  
277 85°22'23.1" W). We collected samples from two biofuel crops within the BCSE, switchgrass  
278 (*Panicum virgatum* L. cultivar "Cave-in-rock") and miscanthus (*Miscanthus x giganteus*). Both  
279 crops had been continuously grown since 2008, in replicate 30 x 40 m plots arrayed in a  
280 randomized complete block design. Within each plot, nitrogen-free (no fertilizer) subplots were  
281 maintained in the western-most 3 m of each plot. We sampled replicate plots 1-4 in both the  
282 main and the nitrogen free subplots. We collected leaf and bulk soil samples every three weeks  
283 across the 2016 growing season, including bare soil in April through senescence in October and  
284 November. In total, we collected 152 soil samples (72 switchgrass and 80 miscanthus) and 136  
285 leaf samples (64 switchgrass and 72 miscanthus). At each sampling time, leaves were collected  
286 and pooled at three flags along a standardized path within each plot. Leaves were removed  
287 from the plant stem using ethanol sterilized gloves, then stored in sterile whirl-pak bags until

288 processing. Bulk soil cores (2 x 10 cm) were collected at the same three locations within a plot,  
289 sieved through 4 mm mesh, then pooled and stored in whirl-pak bags. All samples were kept  
290 on wet ice for transport, then stored at -80 °C.

291 Soil physico-chemical characteristics (pH, lime, P, K, Ca, Mg, organic matter, NO<sub>3</sub>-N, NH<sub>4</sub>-  
292 N, and percent moisture) were measured by the Michigan State University (MSU) Soil and Plant  
293 Nutrient Lab (East Lansing, MI, USA, <http://www.spnl.msu.edu/>) according to their standard  
294 protocols. From each plot, 10 switchgrass leaves or 5 miscanthus leaves were processed for  
295 leaf dry matter content according to <sup>58</sup>. Dried leaves were ground to a fine powder using a  
296 Sampletek 200 vial rotator and iron roll bars (Mavco Industries, Lincoln, NE, USA), then carbon  
297 and nitrogen were measured on an elemental analyzer (Costech ECS 4010; Costech Analytical  
298 Technologies Inc, Valencia, CA, USA). Weather data was collected from the MSU Weather  
299 Station Network, for the Kellogg Biological Station location (<https://mawn.geo.msu.edu>) for  
300 each sampling day, and plant height and soil temperature were measured on a per-plot basis.

301

### 302 *Nucleic acid extraction & sequencing*

303 Throughout, we use “microbiome” to refer to the bacterial and archaeal members as  
304 able to be assessed with 16S rRNA gene sequence analysis. Soil microbial DNA was extracted  
305 using a Powersoil microbial DNA kit (MOBio Inc. Carlsbad, California, USA) according to  
306 manufacturer’s instructions. Phyllosphere epiphytic DNA was extracted from intact leaves using  
307 a benzyl chloride liquid:liquid extraction, followed by an isopropanol precipitation <sup>59</sup>, using  
308 approximately 5 g of leaves (5-10 switchgrass leaves, or a minimum of 2 miscanthus leaves).  
309 Metagenomic DNA from both soil and phyllosphere was quantified using a qubit 2.0

310 fluorometer (Invitrogen, Carlsbad, CA, USA), and DNA concentrations were normalized between  
311 all samples prior to sequencing. Paired-end amplicon sequencing was completed by the  
312 Department of Energy's Joint Genome Institute (JGI) using an Illumina MiSeq sequencer, and  
313 using the 16S-V4 (515F-804R) primer set <sup>60</sup>, according to the JGI's standard operating protocols,  
314 and incorporating chloroplast- and mitochondria-blocking peptide nucleic acids to prevent co-  
315 amplification of plastid 16S rRNA gene as described in <sup>61</sup>.

316 .

317

318 *Sequence quality control and defining operational taxonomic units*

319 BBDuk (v 37.96) was used to remove contaminants and trim adaptor sequences from  
320 reads. Reads containing 1 or more 'N' bases, having an average quality score of less than ten or  
321 less than 51 bases were removed. Common contaminants were removed with BBDuk (v 37.96).  
322 Primers were trimmed using cutadapt (v1.17). Reads were merged, dereplicated, clustered into  
323 97% identity with usearch (v10.0.240), and classified against version 123 of the Silva Database  
324 <sup>62</sup> using syntax <sup>63</sup>. All reads classified as mitochondria, chloroplast or unclassified were removed  
325 before the analysis. Additionally, reads from 4371 OTUs assigned only to the domain level were  
326 extracted and reclassified using SINA online aligner (<https://www.arb-silva.de/aligner/>) <sup>62</sup>. 696  
327 unclassified reads subsequently were confirmed to be Bacteria could then be classified to more  
328 resolved taxonomic levels. Remaining reads were BLASTed against the entire NCBI nucleotide  
329 database and specifically against the switchgrass genome to check for non-specific binding, but  
330 no hits could be found.

331



332 *Alpha and beta diversity*

333 For alpha and beta diversity analyses, we performed analyses to datasets subsampled to  
334 the minimum observed quality-filtered reads per sample (141), as well as to 1000 reads per  
335 sample. We did this to enable comparison of the most complete time series to the most  
336 complete comparative view of diversity. We report richness as total number of OTUs clustered  
337 at 97% sequence identity. We used the protest function in the vegan package in R<sup>64</sup> to test for  
338 synchrony in patterns across crops and years. To calculate beta dispersion, we used the  
339 betadisper function in the vegan package in R<sup>64</sup>, which is a multivariate analogue of Levene's  
340 test for homogeneity of variances. PERMANOVA was used to test hypothesis of beta diversity  
341 using adonis function in the vegan package in R<sup>64</sup>.

342

343 *Source-sink models and contributions of soil taxa to leaf communities*

344 Given that virtually all phyllosphere taxa were present in the soil, we evaluated the degree to  
345 which observed seasonal patterns in phyllosphere community composition could be explained  
346 with a null model. The null model assumed functional equivalence among taxa and random  
347 source-sink dynamics from the soil. For each crop, we simulated community dynamics between  
348 each pair of sequential samples. This involved: (1) calculating the total number of 0.1 %  
349 incremental increases/decreases in OTU relative abundances observed between the two  
350 sampling points; (2) randomly and iteratively selecting OTUs, weighting their probability of  
351 selection by their relative abundances, to increase or decrease by 0.1 % increments of relative  
352 abundance until reaching the total number of observed increases/decreases for the sample  
353 pair; (3) counting the number of immigrant OTUs which appeared only in the second sample of

354 the pair; (4) randomly selecting OTUs in the simulated community to decrease by 0.1 %  
355 increments until the total decrease equaled the observed number of arriving OTUs multiplied  
356 by their median initial abundance (0.1 %); and then (5) randomly selecting, again weighting  
357 their probability of selection by their relative abundance, the predicted number of immigrant  
358 OTUs from the soil community, such that the final simulated community abundance was equal  
359 to 1000 sequences. The source soil community was generated by pooling all soil samples from  
360 both years. We used this process to simulate demographic stochasticity. In the model, it was  
361 assumed that 0.1 % incremental changes in relative abundance realistically reflects  
362 phyllosphere population dynamics, and that an immigration event results in the initial relative  
363 abundance of an OTU at 0.1%. Importantly, even if these assumptions are imprecise, the  
364 simulation provides a consistent baseline of community composition against which to compare  
365 observations over the growing season.

366

#### 367 *Core taxa selection*

368 To infer the core phyllosphere taxa and prioritize them for further inquiry, we calculated the  
369 abundance-occupancy distributions of taxa, as established in macroecology (e.g. Shade et al.  
370 2018). For each OTU, we calculated occupancy and mean relative abundance at each time point  
371 by crop and year. Only OTUs with occupancy of 100% (found in all samples at a particular time  
372 point) were prioritized as core members. Using this conservative threshold for occupancy, we  
373 included all OTUs that had strong temporal signatures; these taxa also were in high abundance  
374 and were persistent as indicated by their abundance-occupancy distributions. These core taxa

375 also represent potentially important players in plant development, as they were detected at  
376 least at one time point in all sampled fields.

377 We quantified the explanatory value of the core members to community temporal  
378 dynamics using a previously published method of partitioning community dissimilarity<sup>65</sup>:

$$379 \quad C = \frac{BC_{core}}{BC_{all}}$$

380 Where  $C$  is the relative contribution of community Bray Curtis ( $BC$ ) dissimilarity  
381 attributed to the core OTUs.

382

### 383 *Hierarchical clustering*

384 To understand the seasonal abundance patterns of the core taxa we performed  
385 hierarchical clustering. We used a z-scored relative abundance matrix subset to contain only  
386 core taxa to generate a w complete linkage distance matrix using the R function `hclust()`<sup>50</sup>.  
387 Groups of core taxa with similar dynamics were defined from the dendrogram using the  
388 function `cutree()` in R with number of desired groups ( $k$ =) to be close to the number of sampling  
389 time points; 8 for miscanthus 2016, 5 for switchgrass 2016 and 7 for switchgrass 2017.

390

### 391 *Availability of data, workflows, and material*

392 The datasets generated and/or analyzed during the current study are available in the  
393 Joint Genomes Institute, Integrated Microbial Genomes repository with JGI Projects designated  
394 by year and sample type (Project ID 1139694, 1139696 for 2016 season phyllosphere and soil,  
395 and 1191516 and 1191517 for 2017 season phyllosphere and soil sequences, respectively). Our

396 sequence analyses and statistical workflows are available at

397 [https://github.com/ShadeLab/PAPER\\_GradySorensenStopnisek\\_InPrep](https://github.com/ShadeLab/PAPER_GradySorensenStopnisek_InPrep)

398

399 Competing interests

400 The authors declare that they have no competing interests.

401

402 Authors' contributions

403 AS designed the study. AS, KLG, JS, and NS conducted field work. KLG executed lab work. JS,

404 NS, JG, and AS analyzed the data. All authors discussed and revised the manuscript.

405

406 Acknowledgements

407 We thank SH Lee, M Sleda, S Wu and M Nunez for technical assistance in the field and

408 laboratory. This material is based upon work supported by the Great Lakes Bioenergy Research

409 Center, U.S. Department of Energy, Office of Science, Office of Biological and Environmental

410 Research under Award Numbers DE-SC0018409 and DE-FC02-07ER64494. The work conducted

411 by the U.S. Department of Energy Joint Genome Institute, a DOE Office of Science User Facility,

412 is supported under Contract No. DE-AC02-05CH11231. This work was supported in part by

413 Michigan State University through computational resources provided by the Institute for Cyber-

414 Enabled Research. NS acknowledges support from the Michigan State Plant Resilience Institute.

415

416

417

418 Figure Legends

419 **Figure 1. Sequencing effort and alpha diversity for switchgrass and miscanthus phyllosphere**

420 **and soils.** Operational taxonomic units (OTUs) were defined at 97% sequence identity of 16S  
421 rRNA gene amplicons. (A) Rarefaction curves of quality-controlled reads. The vertical line is the  
422 maximum number of sequences observed in a sample, and the horizontal line is the richness of  
423 that sample. (B) Phyllosphere richness accumulation over time, using a dataset subsampled to  
424 1000 sequences per sample.

425

426 **Figure 2. Seasonal patterns in the structures of bacterial and archaeal communities**

427 **inhabiting the phyllosphere and associated soils of the biofuel feedstocks switchgrass and**

428 **miscanthus.** (A) Principal coordinates analysis (PCoA) of switchgrass and miscanthus  
429 phyllosphere communities (Bray-Curtis dissimilarity), error bars show 1 deviation around the  
430 centroid (n = 1 to 8 replicate plots/time point). (B) PCoA of the phyllosphere communities  
431 relative to the soil. For both A and B, subsampling depth was 1000 reads per sample and  
432 environmental vectors were fitted when  $r^2 > 0.4$  and  $p < 0.05$ .

433

434 **Figure 3. The majority of phyllosphere taxa were also present in the soil. (A)** Circles represent

435 the mean number of OTUs found in up to eight replicate phyllosphere samples, subsampled to  
436 1000 sequences, for each crop at each time point. An OTU was considered present in the soil if  
437 it occurred at any abundance in any of the 202 unrarefied soil samples over two years. **(B)** The  
438 fractions of the phyllosphere communities present in the soil were even greater when  
439 considering the relative abundances of taxa; each circle represents the mean total relative

440 abundance of leaf taxa present in the soil in up to four replicate phyllosphere samples. **(C)** The  
441 relative abundances of taxa in pooled phyllosphere samples and pooled soil samples were  
442 positively correlated among taxa that were present at greater than 0.01% total abundance in  
443 the soil. Each black circle represents an OTU present in both phyllosphere and soil  
444 communities; a LOESS smoothing function is shown as a red line. Core members are shown as  
445 large green circles. **(D-F)** Source-sink models of phyllosphere community assembly from soils.  
446 Violin plots show the numbers of observed taxa in the phyllosphere were consistently lower  
447 than the richness values predicted by model simulations. The model assumed random increases  
448 and decreases in taxon abundances between time points and random immigration from the soil  
449 community (see Methods). Each circle represents a single phyllosphere sample.

450

451 **Figure 4. Selection and dynamics of core phyllosphere members.** Abundance-occupancy of  
452 leaf taxa for **(A)** miscanthus 2016, **(B)** switchgrass 2016, and **(C)** switchgrass 2017, and their  
453 inclusion in their respective cores. Each point is an OTU. Abundance-occupancy distributions  
454 were calculated at each time point, and taxa that had 100% occupancy at any time point (e.g.,  
455 were detected in all replicate plots at one sampling date) were included in the core (green).  
456 Non-core taxa that were detected in both crops (white/open circles), and crop-specific taxa  
457 (grey) are also indicated. **(D-F)** Contributions of the core taxa to changes in beta diversity over  
458 time. **(G-I)** Patterns of core taxa that share similar temporal changes, as determined by  
459 hierarchical clustering of standardized dynamics. Colors correspond to the dendrograms in  
460 **Figure S7.** **(J-L)** Patterns of core taxa summed by relative abundances within bacterial class.  
461 “c:” is class and “p:” is phylum.

462

463 **Figure 5. Compensatory patterns of Protobacteria classes over crops and season in the**  
464 **phyllosphere of switchgrass and miscanthus.** Proteobacteria OTUs contributed 35.2% of the  
465 total taxa detected in the phyllosphere and contributed 116,760 total reads (34.1% of the leaf  
466 reads). **(A)** Changes in the relative contributions of all 521 leaf-detected Proteobacteria OTUs by  
467 class, over time. **(B-D)** Vignettes showing different dynamics of Proteobacteria OTUs that were  
468 detected within the phyllosphere core microbiome, over time and across crops. Class is “c:”  
469 and genus is “g:”.

470

471

472 Table

473 **Table 1.** Permuted multivariate analysis of variance (PERMANOVA) tables for all hypothesis

474 tests for differences in community structure (beta diversity).

475

476

477



478 Supporting Figures

479 **Figure S1. Seasonal patterns in the number of observed phyllosphere taxa (richness).**

480 Operational taxonomic units (OTUs) were defined at 97% amplicon sequence identity. Richness  
481 is provided at subsampling depths of 1000 reads (top) and 141 reads (bottom).

482

483 **Figure S2. Seasonal patterns in the structures of bacterial and archaeal communities**

484 **inhabiting the phyllosphere and associated soils of the biofuel feedstocks switchgrass and**

485 **miscanthus.** (A) Principal coordinates analysis (PCoA) of switchgrass and miscanthus

486 phyllosphere communities (Bray-Curtis dissimilarity), error bars show 1 deviation around the

487 centroid (n = 3 to 8 replicate plots/time point). Subsampling depth was 141 reads per sample

488 and environmental vectors are fitted when  $r^2 > 0.4$  and  $p < 0.05$ . (B) PCoA of the phyllosphere

489 communities relative to the soil, subsampled to 141 sequences per sample. (C) PCoA of the soil

490 communities associated with miscanthus and switchgrass, subsampled to 19,967 sequences per

491 sample.

492

493 **Figure S3. Phyllosphere communities become less variable over time.** Distance to median was

494 calculated by analysis of beta-dispersion. Variability in phyllosphere microbiome structure over

495 time miscanthus 2016, switchgrass 2016, and switchgrass 2017 field seasons. Betadispersion

496 was calculated from data series subsampled to 1000 reads (top) and 141 reads (bottom).

497

498 **Figure S4. Decreases in the contributions of soil-dominating taxa to the phyllosphere**

499 **microbiome over time.** Heatmaps represent the 50 top-ranked OTUs from the soil that were

500 also detected in the phyllosphere. The cell colors are the z-scored relative abundances of the  
501 OTUs in the phyllosphere. The ranking is from top to bottom (e.g., the most abundant soil-  
502 dominant taxon that was also detected in the phyllosphere is represented by the top row in the  
503 heatmap). The left bar shows the classification the taxon as either a core member (green) or  
504 not (pink). **(A)** Miscanthus 2016; **(B)** switchgrass 2016; **(C)** switchgrass 2017.

505

506 **Figure S5. Intra-crop similarity in leaf communities over time in 2016.** We show changes in  
507 Bray-Curtis dissimilarities between switchgrass and miscanthus phyllosphere microbiomes per  
508 time point, inclusive of the maximum number of replicated blocks (up to 8) per time point. **(A)**  
509 “Full” time series, subsampled to 141 reads per sample. **(B)** Time series subsampled to 1000  
510 reads per sample.

511

512 **Figure S6. Venn diagram of taxa shared across the switchgrass and miscanthus phyllosphere,**  
513 in 2016 and 2017. Data were rarefied to 1000 reads per sample.

514

515 **Figure S7. Hierarchical clustering of standardized (z-scored) dynamics of core phyllosphere**  
516 **taxa on the phyllosphere of miscanthus 2016 (A), switchgrass 2016 (B) and switchgrass 2017**  
517 **(C).** Seasonally discrete clusters coincide with plant phenology, including groups that achieved  
518 highest relative abundance during early (red), mid (gray) and late (blue) plant growth. Clusters  
519 are labeled in order of temporal occurrence in **Figure 4G-I**. Circles on the dendrogram tips are  
520 color coded by OTU taxonomic classification and labeled with the OTU ID.

521

522

523 Supporting Tables

524 **Table S1. Sequencing summary of phyllosphere microbial communities characterized in this**

525 **study**, categorized by crop and year.

526

527 **Table S2. Comparison of overarching patterns of beta diversity across the same dataset**

528 **rarefied to different sequencing depths.** We compared all pairs of 141, 500, 1000, 5000, or

529 10000 reads per sample. All Mantel tests were significant at  $p < 0.001$  on 1000 permutations.

530

531 **Table S3.** Fitted environmental variables that explain changes in microbiome community

532 structure. Values in which EnvFit  $R^2 > 0.40$  were plotted as vectors in **Figure 2**.

533

534 Datasets

535 **Dataset 1.** Operational taxonomic unit identifiers and representative 16S rRNA gene amplicon

536 sequences of the core switchgrass and miscanthus phyllosphere microbiota.

537

538

539 **References**

- 540 1. Peñuelas, J. & Terradas, J. The foliar microbiome. *Trends Plant Sci.* **19**, 278–280 (2014).
- 541 2. Lindow, S. E. & Brandl, M. T. Microbiology of the phyllosphere. *Appl. Environ. Microbiol.*
- 542 **69**, 1875–1883 (2003).
- 543 3. Vorholt, J. A. Microbial life in the phyllosphere. *Nat. Rev. Microbiol.* **10**, 828–840 (2012).
- 544 4. Foley, J. A. *et al.* Solutions for a cultivated planet. *Nature* **478**, 337–342 (2011).
- 545 5. Hamilton, C. E., Gundel, P. E., Helander, M. & Saikkonen, K. Endophytic mediation of
- 546 reactive oxygen species and antioxidant activity in plants: a review. *Fungal Divers.* **54**, 1–
- 547 10 (2012).
- 548 6. Lindow, S. E. & Leveau, J. H. J. Phyllosphere microbiology. *Curr. Opin. Biotechnol.* **13**,
- 549 238–243 (2002).
- 550 7. Redman, R. S., Sheehan, K. B., Stout, R. G., Rodriguez, R. J. & Henson, J. M.
- 551 Thermotolerance generated by plant/fungal symbiosis. *Science* **298**, 1581 (2002).
- 552 8. Canto, A. & Herrera, C. M. Micro-organisms behind the pollination scenes: Microbial
- 553 imprint on floral nectar sugar variation in a tropical plant community. *Ann. Bot.* **110**,
- 554 1173–1183 (2012).
- 555 9. Doty, S. L. *et al.* Diazotrophic endophytes of native black cottonwood and willow.
- 556 *Symbiosis* **47**, 23–33 (2009).
- 557 10. Taghavi, S. *et al.* Genome survey and characterization of endophytic bacteria exhibiting a
- 558 beneficial effect on growth and development of poplar trees. *Appl. Environ. Microbiol.*
- 559 **75**, 748–757 (2009).
- 560 11. Lee, D. W., Hong, J. S., Kim, S. H., Kim, J. W. & Kim, B. S. First Report of *Pseudomonas*

- 561 lurida Causing Bacterial Leaf Spot on Miscanthus sinensis. *J. Phytopathol.* **162**, 195–200  
562 (2014).
- 563 12. Wagner, M. R. *et al.* Natural soil microbes alter flowerig phenology and the intensity of  
564 selection on flowering time in a wild *Arabidopsis* relative`. *Ecol. Lett.* **17**, 717–726 (2014).
- 565 13. Iguchi, M., Yamanaka, S. & Budhiono, A. Bacterial cellulose - a masterpiece of nature's  
566 arts. *J. Mater. Sci.* **35**, 261–270 (2000).
- 567 14. Galbally, I. E. & Kirstine, W. The production of methanol by flowering plants and the  
568 global cycle of methanol. *J. Atmos. Chem.* **43**, 195–229 (2002).
- 569 15. Fürnkranz, M. *et al.* Nitrogen fixation by phyllosphere bacteria associated with higher  
570 plants and their colonizing epiphytes of a tropical lowland rainforest of Costa Rica. *ISME*  
571 *J.* **2**, 561–570 (2008).
- 572 16. Weyens, N., van der Lelie, D., Taghavi, S., Newman, L. & Vangronsveld, J. Exploiting plant-  
573 microbe partnerships to improve biomass production and remediation. *Trends in*  
574 *Biotechnology* **27**, 591–598 (2009).
- 575 17. Hacquard, S. & Schadt, C. W. Towards a holistic understanding of the beneficial  
576 interactions across the *Populus* microbiome. *New Phytologist* **205**, 1424–1430 (2015).
- 577 18. Kinkel, L. L. Microbial Population Dynamics on Leaves. *Annu. Rev. Phytopathol.* **35**, 327–  
578 347 (1997).
- 579 19. Lebeis, S. L. The potential for give and take in plant-microbiome relationships. *Front.*  
580 *Plant Sci.* **5**, 1–6 (2014).
- 581 20. Vandenkoornhuyse, P., Quaiser, A., Duhamel, M., Le Van, A. & Dufresne, A. The  
582 importance of the microbiome of the plant holobiont. *New Phytol.* **206**, 1196–1206

- 583 (2015).
- 584 21. Turner, T. R., James, E. K. & Poole, P. The plant microbiome. *Genome Biol.* **14**, (2013).
- 585 22. Heaton, E. A., Dohleman, F. G. & Long, S. P. Meeting US biofuel goals with less land: The  
586 potential of Miscanthus. *Glob. Chang. Biol.* **14**, 2000–2014 (2008).
- 587 23. Tornqvist, C. E. *et al.* Transcriptional Analysis of Flowering Time in Switchgrass. *Bioenergy*  
588 *Res.* **10**, 700–713 (2017).
- 589 24. Robertson, G. P. *et al.* Cellulosic biofuel contributions to a sustainable energy future:  
590 Choices and outcomes. *Science.* **356**, 1-9 (2017).
- 591 25. Stoof, C. R. *et al.* Untapped Potential: Opportunities and Challenges for Sustainable  
592 Bioenergy Production from Marginal Lands in the Northeast USA. *BioEnergy Res.* **8**, 482–  
593 501 (2015).
- 594 26. Johnson, D. R. & Tanner, J. W. Comparisons of Corn (*Zea mays* L.) Inbreds and Hybrids  
595 Grown at Equal Leaf Area Index, Light Penetration, and Population is generally accepted  
596 that corn hybrids (*Zea mays* L.) are superior to inbred lines in terms of overall size  
597 and yield. *At a.* 482–485 (1972).
- 598 27. Wang, B., Seiler, J. R. & Mei, C. A microbial endophyte enhanced growth of switchgrass  
599 under two drought cycles improving leaf level physiology and leaf development. *Environ.*  
600 *Exp. Bot.* **122**, 100–108 (2016).
- 601 28. Ong, R. G. *et al.* Inhibition of microbial biofuel production in drought-stressed  
602 switchgrass hydrolysate. *Biotechnol. Biofuels* **9**, 1–14 (2016).
- 603 29. Emerson, R. *et al.* Drought effects on composition and yield for corn stover, mixed  
604 grasses, and Miscanthus as bioenergy feedstocks. *Biofuels* **5**, 275–291 (2014).

- 605 30. Fitzpatrick, C. R. *et al.* Assembly and ecological function of the root microbiome across  
606 angiosperm plant species. *Proc. Natl. Acad. Sci.* 201717617 (2018).
- 607 31. Santos-Medellín, C., Edwards, J., Liechty, Z., Nguyen, B. & Sundaresan, V. Drought Stress  
608 Results in a Compartment-Specific Restructuring of. *MBio* **8**, 1–15 (2017).
- 609 32. Cox, C. M., Bockus, W. W., Holt, R. D., Fang, L. & Garrett, K. A. Spatial connectedness of  
610 plant species: Potential links for apparent competition via plant diseases. *Plant Pathol.*  
611 **62**, 1195–1204 (2013).
- 612 33. Alexander, H. M., Bruns, E., Schebor, H. & Malmstrom, C. M. Crop-associated virus  
613 infection in a native perennial grass: reduction in plant fitness and dynamic patterns of  
614 virus detection. *J. Ecol.* **105**, 1021–1031 (2017).
- 615 34. Sattler, S. E. & Funnell-Harris, D. L. Modifying lignin to improve bioenergy feedstocks:  
616 strengthening the barrier against pathogens? *Front. Plant Sci.* **4**, 1–8 (2013).
- 617 35. Bodenhausen, N., Horton, M. W. & Bergelson, J. Bacterial Communities Associated with  
618 the Leaves and the Roots of *Arabidopsis thaliana*. *PLoS One* **8**, (2013).
- 619 36. Barret, M. *et al.* Emergence shapes the structure of the seed microbiota. *Appl. Environ.*  
620 *Microbiol.* **81**, 1257–1266 (2015).
- 621 37. Hamonts, K. *et al.* Field study reveals core plant microbiota and relative importance of  
622 their drivers. *Environ. Microbiol.* **20**, 124–140 (2018).
- 623 38. Copeland, J. K., Yuan, L., Layeghifard, M., Wang, P. W. & Guttman, D. S. Seasonal  
624 Community Succession of the Phyllosphere Microbiome. *Mol. Plant-Microbe Interact.* **28**,  
625 274–285 (2015).
- 626 39. Ottesen, A. R. *et al.* Using a Control to Better Understand Phyllosphere Microbiota. *PLoS*

- 627            *One* **11**, 1-16 (2016).
- 628    40.    Maignien, L., DeForce, E. A., Chafee, M. E., Murat Eren, A. & Simmons, S. L. Ecological  
629            succession and stochastic variation in the assembly of *Arabidopsis thaliana* phyllosphere  
630            communities. *MBio* **5**, (2014).
- 631    41.    Vokou, D. *et al.* Exploring biodiversity in the bacterial community of the mediterranean  
632            phyllosphere and its relationship with airborne bacteria. *Microb. Ecol.* **64**, 714–724  
633            (2012).
- 634    42.    Gaston, K. J. *et al.* Abundance - occupancy relationships. *J. Appl. Ecol.* **37**, 39–59 (2000).
- 635    43.    Shade, A. *et al.* Macroecology to unite all life, large and small. *Trends Ecol. Evol.* (2018).
- 636    44.    Burns, A. R. *et al.* Contribution of neutral processes to the assembly of gut microbial  
637            communities in the zebrafish over host development. *ISME J.* **10**, 655–664 (2016).
- 638    45.    Shade, A. & Handelsman, J. Beyond the Venn diagram: The hunt for a core microbiome.  
639            *Environ. Microbiol.* **14**, 4–12 (2012).
- 640    46.    Astudillo-García, C. *et al.* Evaluating the core microbiota in complex communities: A  
641            systematic investigation. *Environ. Microbiol.* **19**, 1450–1462 (2017).
- 642    47.    Shade, A. *et al.* Culturing captures members of the soil rare biosphere. *Environmental*  
643            *Microbiology* **14**, 2247–2252 (2012).
- 644    48.    Knief, C., Ramette, A., Frances, L., Alonso-Blanco, C. & Vorholt, J. A. Site and plant species  
645            are important determinants of the *Methylobacterium* community composition in the  
646            plant phyllosphere. *ISME J.* **4**, 719–728 (2010).
- 647    49.    Rastogi, G., Coaker, G. L. & Leveau, J. H. J. J. New insights into the structure and function  
648            of phyllosphere microbiota through high-throughput molecular approaches. *FEMS*



- 649 *Microbiol. Lett.* **348**, 1–10 (2013).
- 650 50. R Core Team. R: A language and environment for statistical computing. R Foundation for  
651 Statistical Computing, Vienna, Austria. <https://www.R-project.org/>.(2018).
- 652 51. Martiny, J. B. H., Jones, S. E., Lennon, J. T. & Martiny, A. C. Microbiomes in light of traits:  
653 A phylogenetic perspective. *Science (80)*. **350**, (2015).
- 654 52. Ding, T. & Melcher, U. Influences of plant species, season and location on leaf endophytic  
655 bacterial communities of non-cultivated plants. *PLoS One* **11**, 1–13 (2016).
- 656 53. Bringel, F. & Couée, I. Pivotal roles of phyllosphere microorganisms at the interface  
657 between plant functioning and atmospheric trace gas dynamics. *Front. Microbiol.* **6**,  
658 (2015).
- 659 54. Delmotte, N. *et al.* Community proteogenomics reveals insights into the physiology of  
660 phyllosphere bacteria. *Proc. Natl. Acad. Sci.* **106**, 16428–16433 (2009).
- 661 55. Wagner, M. R. *et al.* Host genotype and age shape the leaf and root microbiomes of a  
662 wild perennial plant. *Nat. Commun.* **7**, 12151 (2016).
- 663 56. Laforest-Lapointe, I., Messier, C. & Kembel, S. W. Tree phyllosphere bacterial  
664 communities: exploring the magnitude of intra- and inter-individual variation among host  
665 species. *PeerJ* **4**, e2367 (2016).
- 666 57. Agler, M. T. *et al.* Microbial Hub Taxa Link Host and Abiotic Factors to Plant Microbiome  
667 Variation. *PLoS Biol.* **14**, 1–31 (2016).
- 668 58. Cornelissen, J. H. C. *et al.* A handbook of protocols for standardised and easy  
669 measurement of plant functional traits worldwide. *Aust. J. Bot.* **51**, 335–380 (2003).
- 670 59. Suda, W., Oto, M., Amachi, S., Shinoyama, H. & Shishido, M. A Direct Method to Isolate

- 671 DNA from Phyllosphere Microbial Communities without Disrupting Leaf Tissues.  
672 *Microbes Environ.* **23**, 248–252 (2008).
- 673 60. Caporaso, J. G. *et al.* Moving pictures of the human microbiome. *Genome Biol.* **12**,  
674 (2011).
- 675 61. Lundberg, D. S., Yourstone, S., Mieczkowski, P., Jones, C. D. & Dangl, J. L. Practical  
676 innovations for high-throughput amplicon sequencing. *Nat. Methods* **10**, 999–1002  
677 (2013).
- 678 62. Quast, C. *et al.* The SILVA ribosomal RNA gene database project: Improved data  
679 processing and web-based tools. *Nucleic Acids Res.* **41**, (2013).
- 680 63. Edgar, R. C. SINTAX: a simple non-Bayesian taxonomy classifier for 16S and ITS  
681 sequences. *Preprint at doi:10.1101/074161* (2016).
- 682 64. Oksanen, J. *et al.* vegan: Community Ecology Package. R Package version 2.5-2. (2018).
- 683 65. Shade, A. *et al.* Conditionally rare taxa disproportionately contribute to temporal  
684 changes in microbial diversity. *MBio* **5**, 1–9 (2014).
- 685

**A**

Figure 1

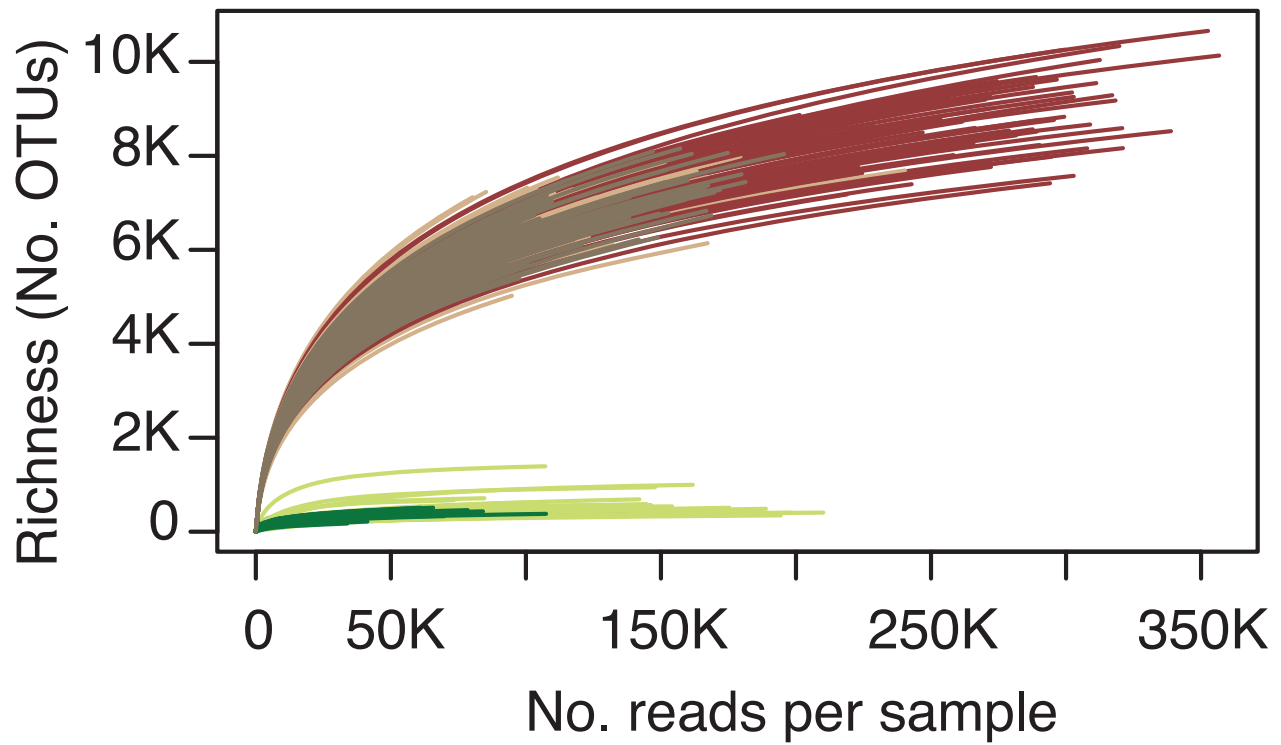

**B**

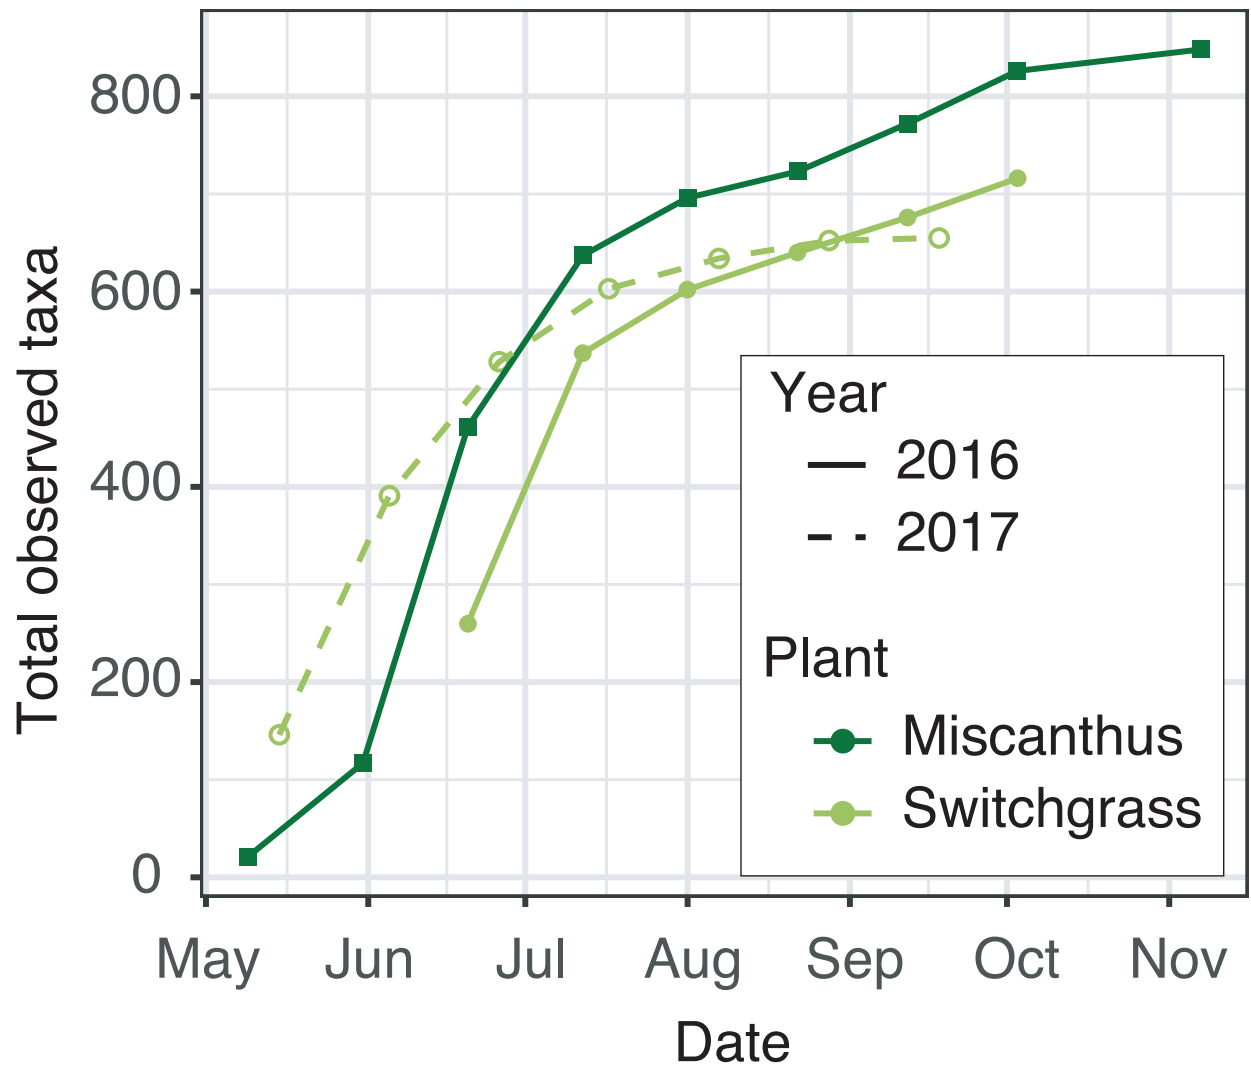

## Figure 2

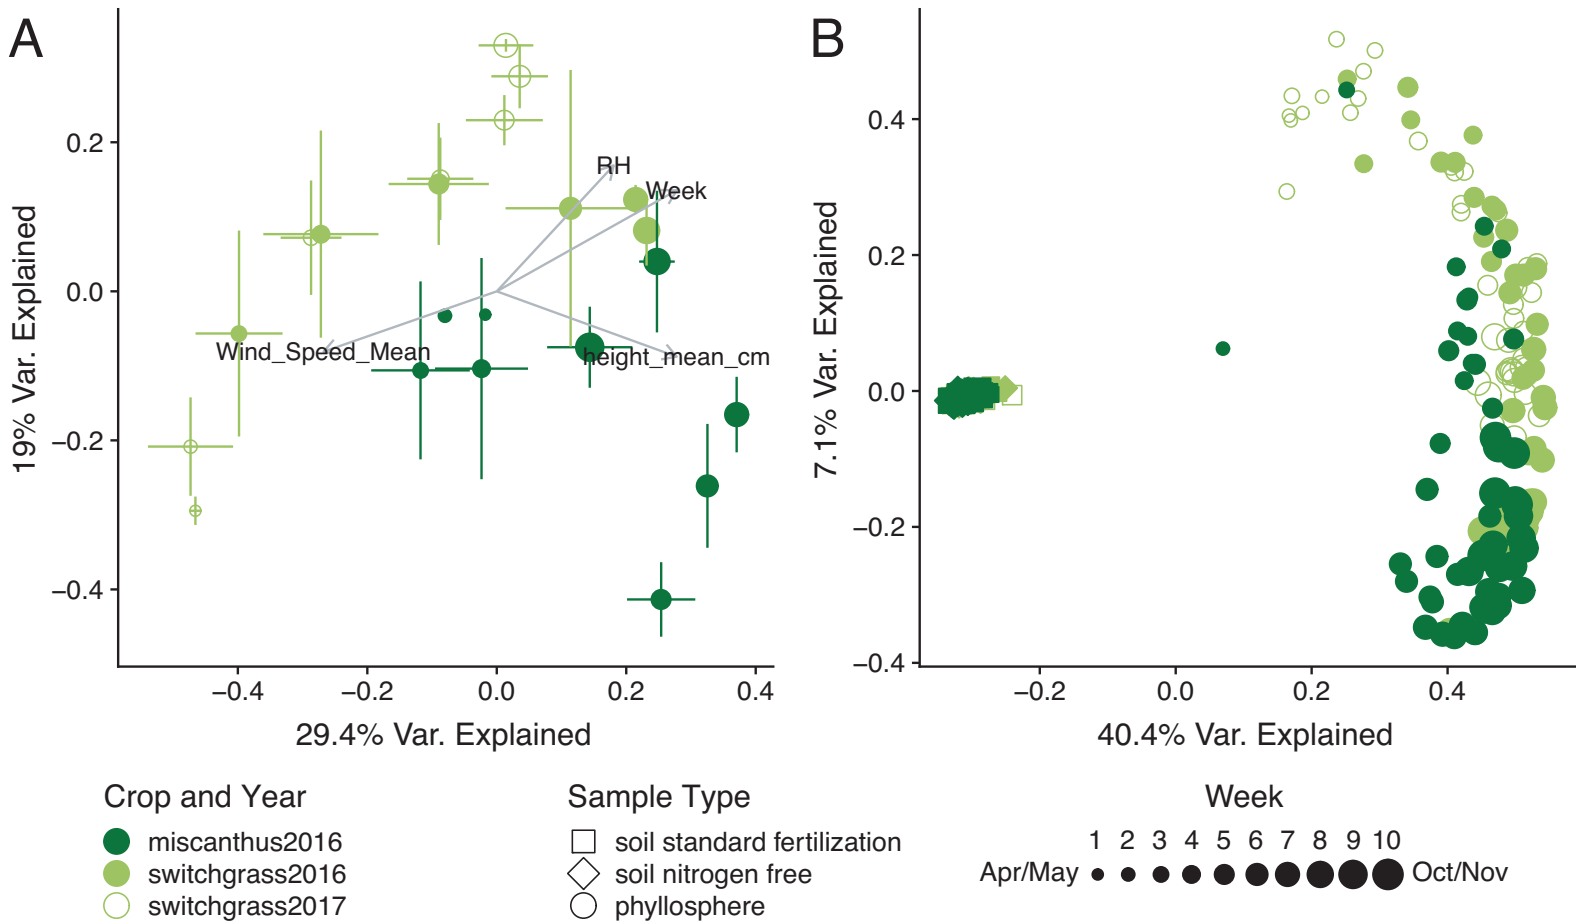

# Figure 3

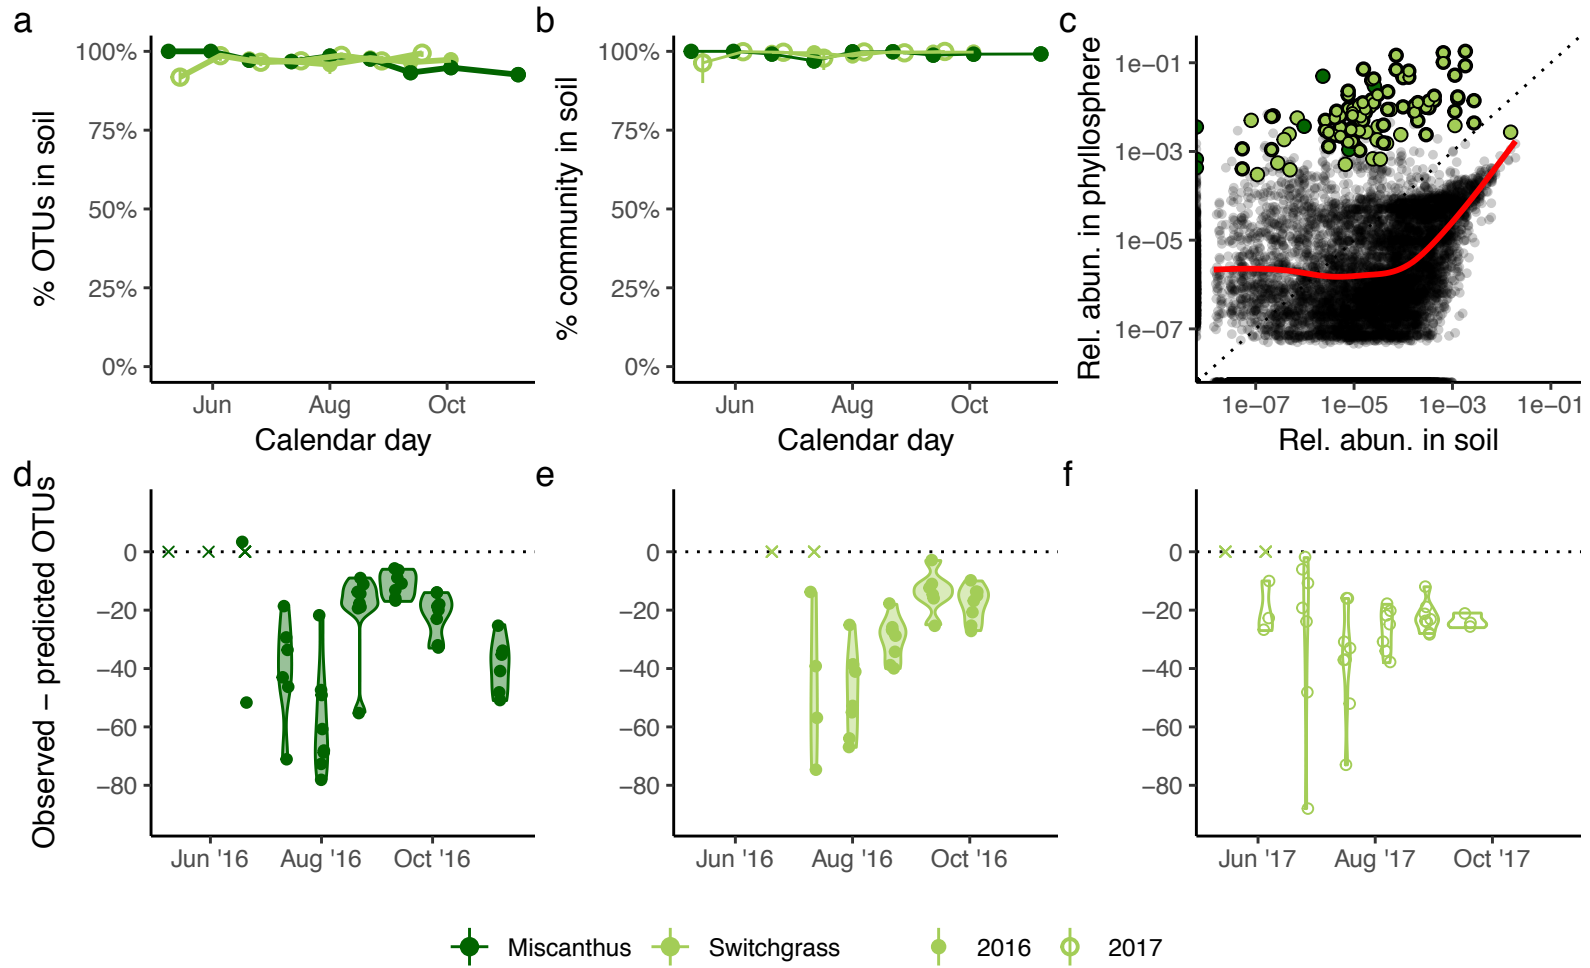

## Figure 4

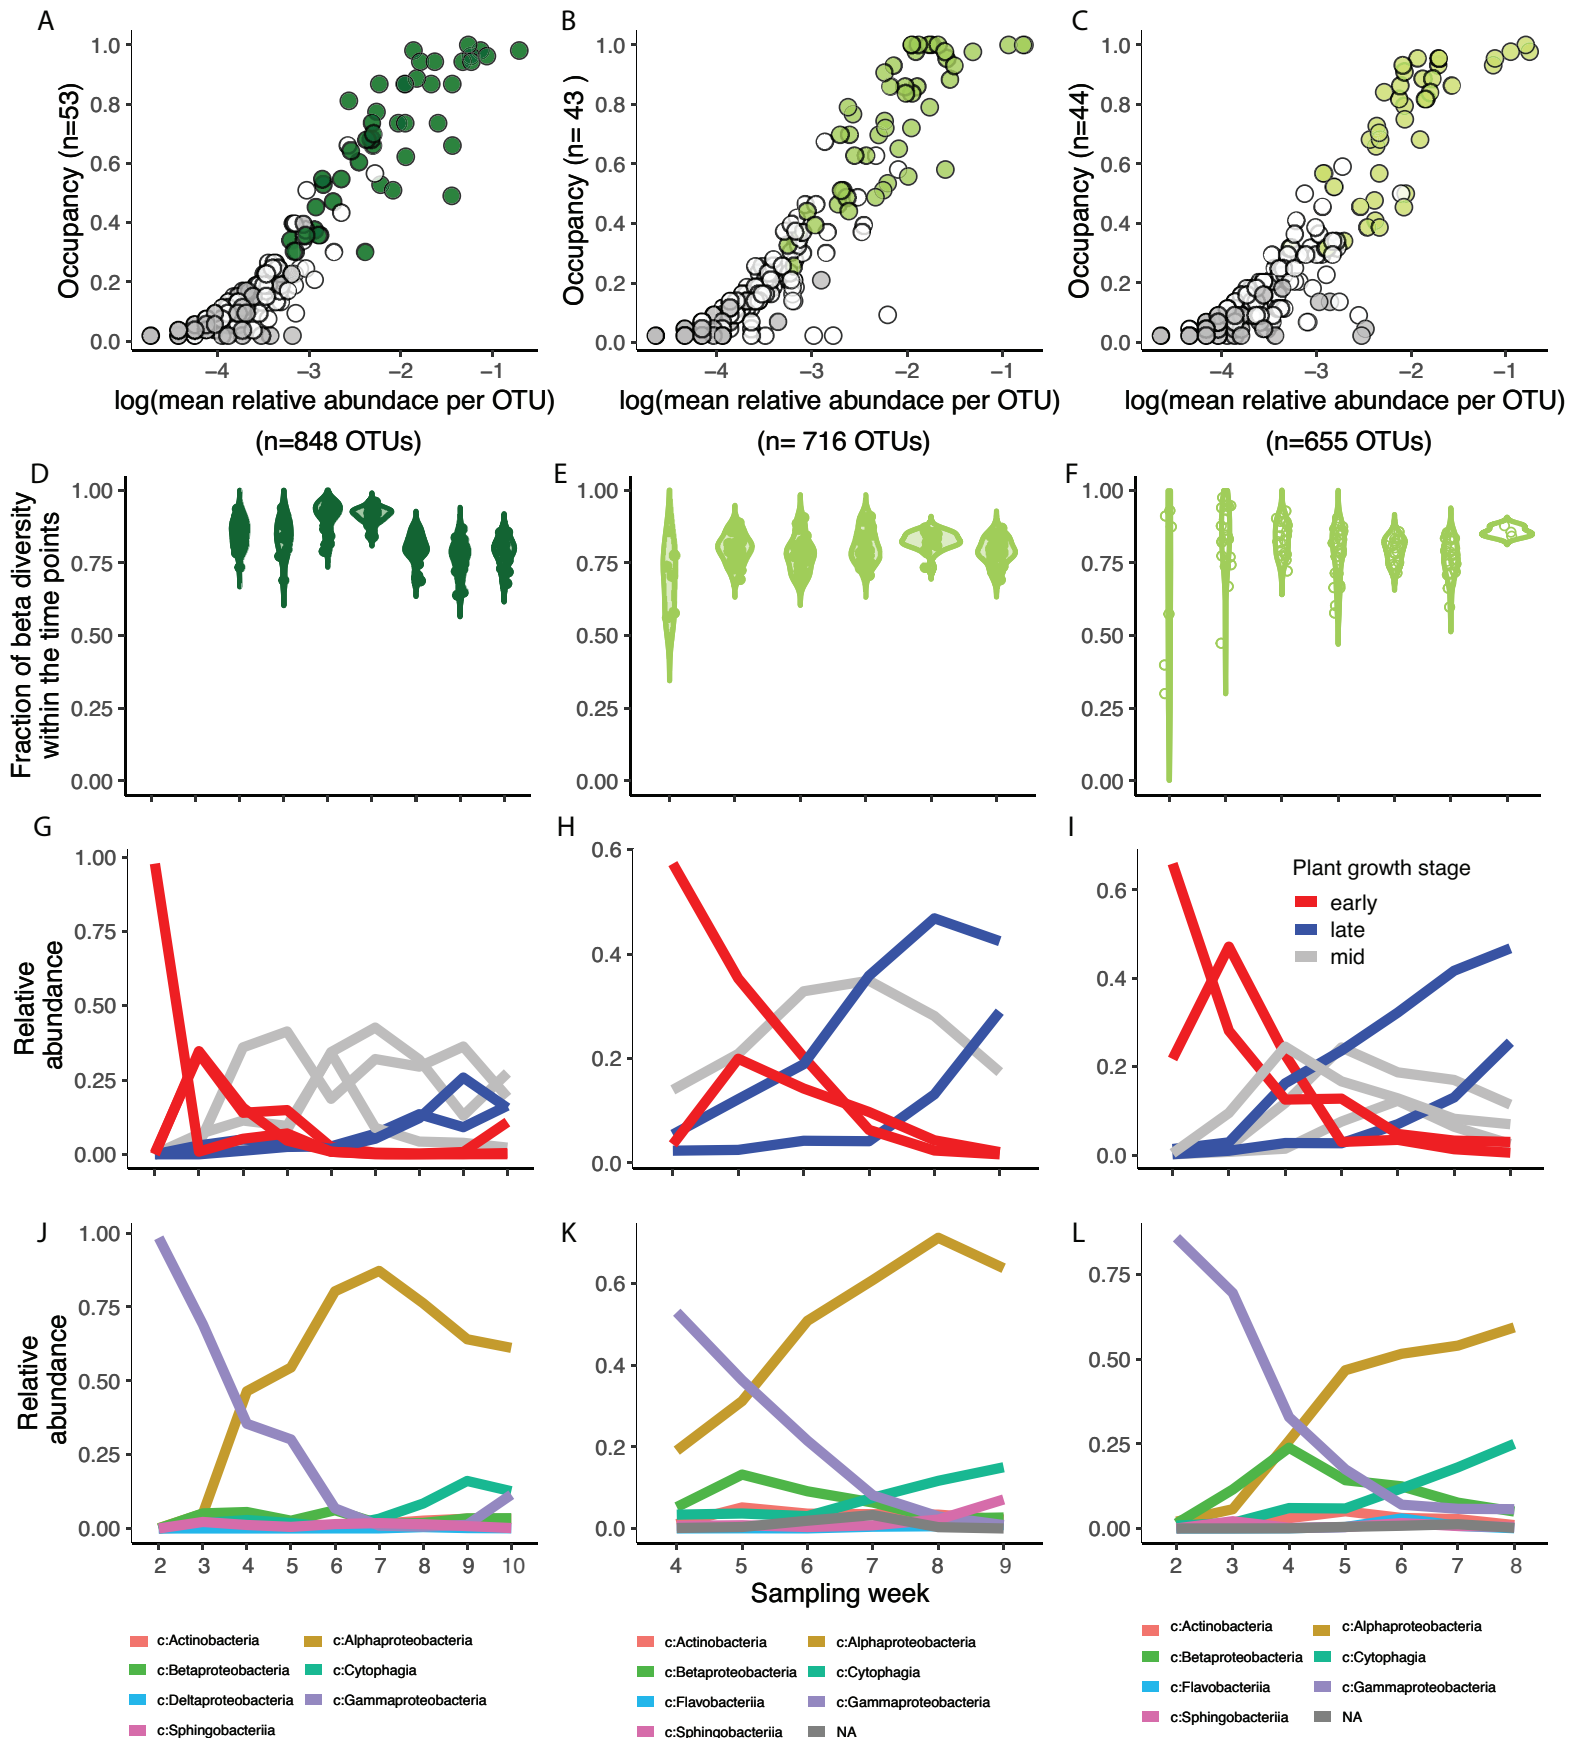

**Figure 5**

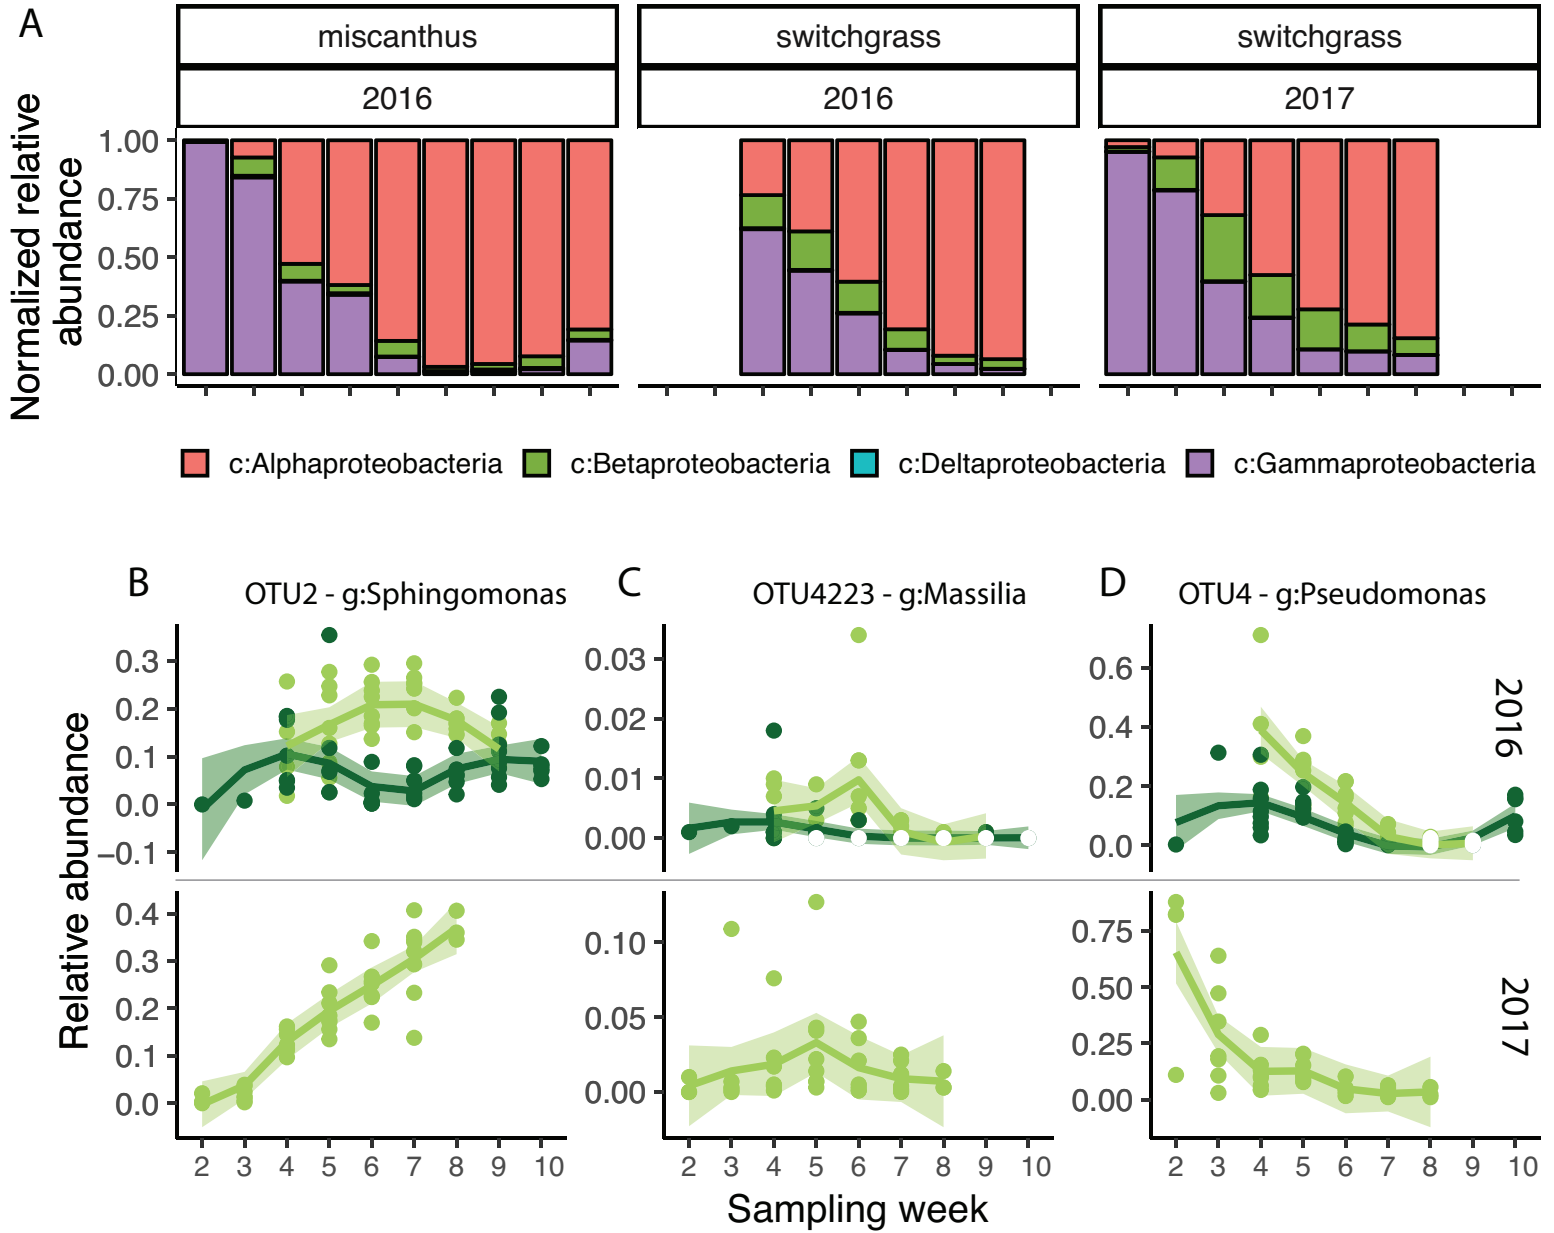

**Table 1.** Permuted multivariate analysis of variance (PERMANOVA) tables for all hypothesis tests for differences in community structure (beta diversity).

| Dataset           | Variable Tested                   | Degrees of Freedom | PseudoF | R squared | p-value |
|-------------------|-----------------------------------|--------------------|---------|-----------|---------|
| 2016 All          | Microbiome habitat (soil v. leaf) | 1                  | 166.09  | 0.415     | 0.001   |
| 2017 All          | Microbiome habitat (soil v. leaf) | 1                  | 74.66   | 0.418     | 0.001   |
| 2016 Phyllosphere | Time                              | 1                  | 21.02   | 0.183     | 0.001   |
| 2016 Soil         | Time                              | 1                  | 7.31    | 0.050     | 0.001   |
| 2017 Phyllosphere | Time                              | 1                  | 29.09   | 0.409     | 0.001   |
| 2017 Soil         | Time                              | 1                  | 3.05    | 0.048     | 0.001   |
| 2016 Phyllosphere | Crop                              | 1                  | 14.50   | 0.134     | 0.001   |
| 2016 Soil         | Crop                              | 1                  | 6.76    | 0.047     | 0.001   |
| 2016 Phyllosphere | Fertilization status              | 1                  | 0.40    | 0.004     | 0.95    |
| 2016 Soil         | Fertilization status              | 1                  | 4.77    | 0.033     | 0.001   |
| 2017 Phyllosphere | Fertilization status              | 1                  | 0.87    | 0.020     | 0.438   |
| 2017 Soil         | Fertilization status              | 1                  | 3.41    | 0.054     | 0.001   |



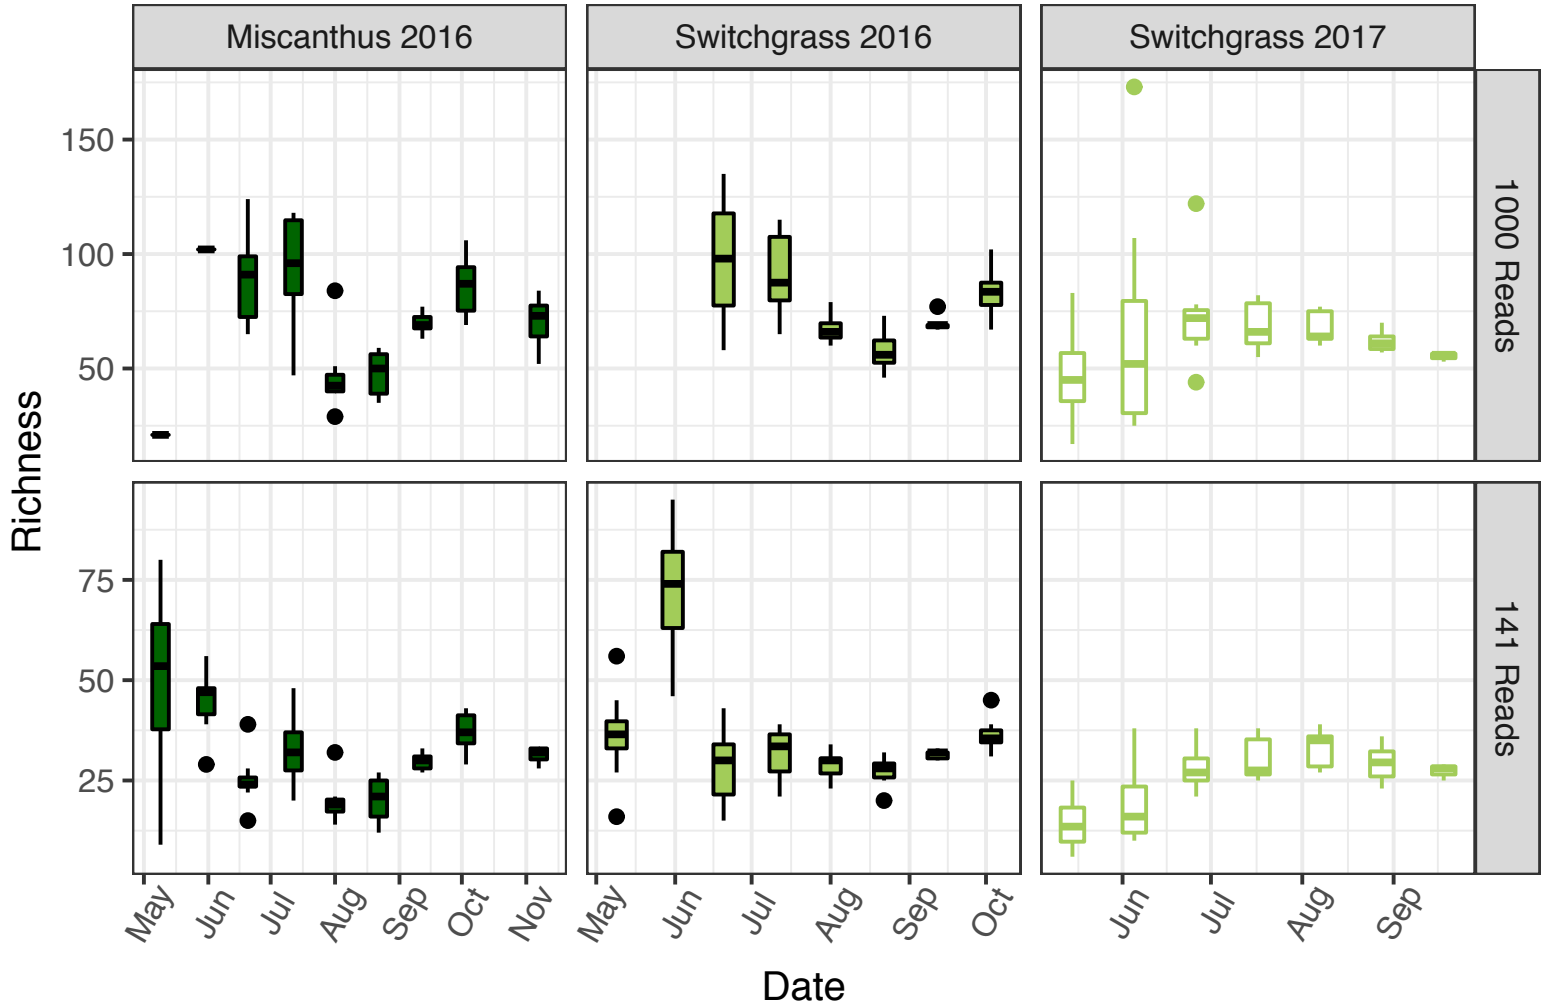

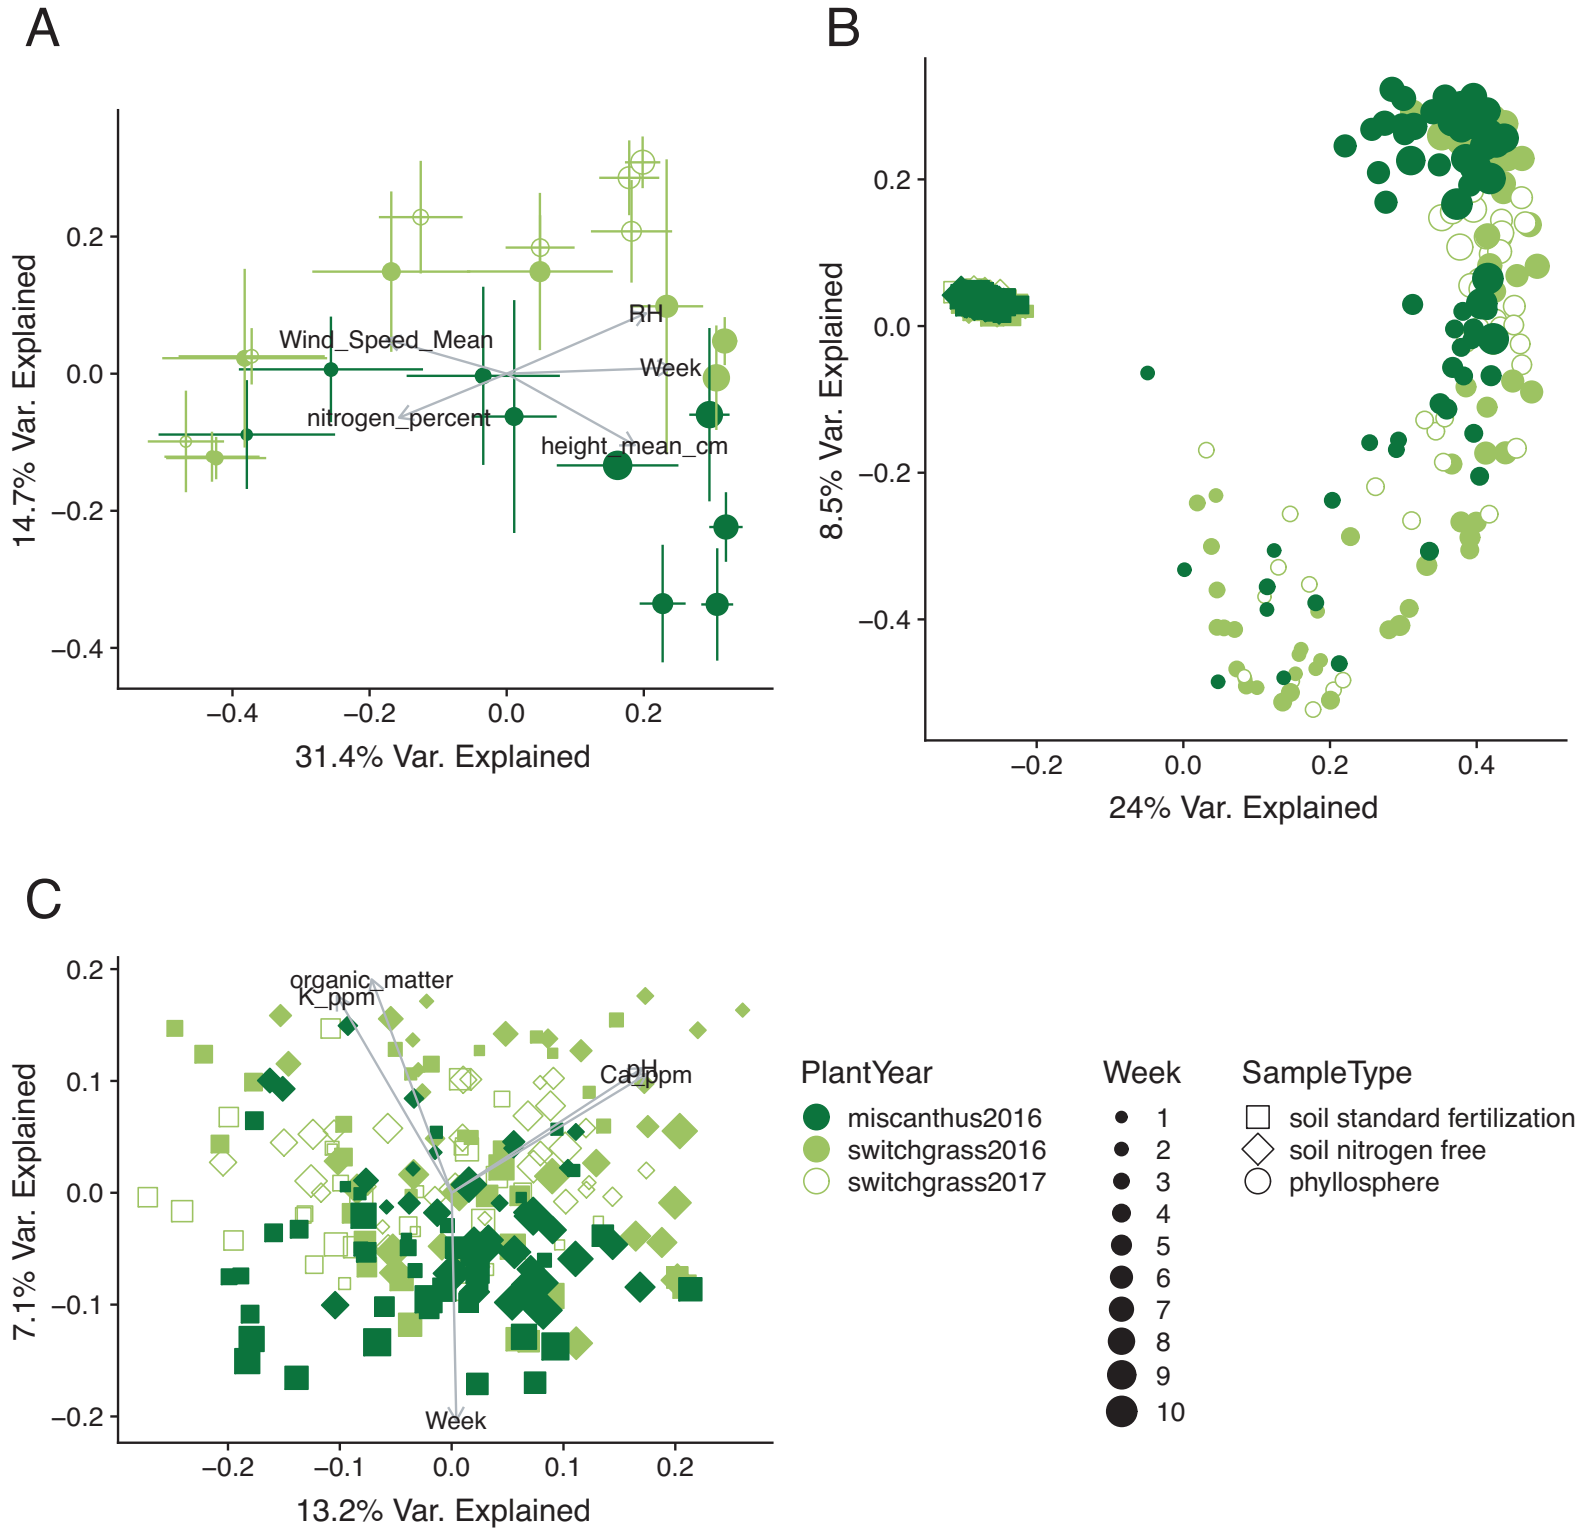

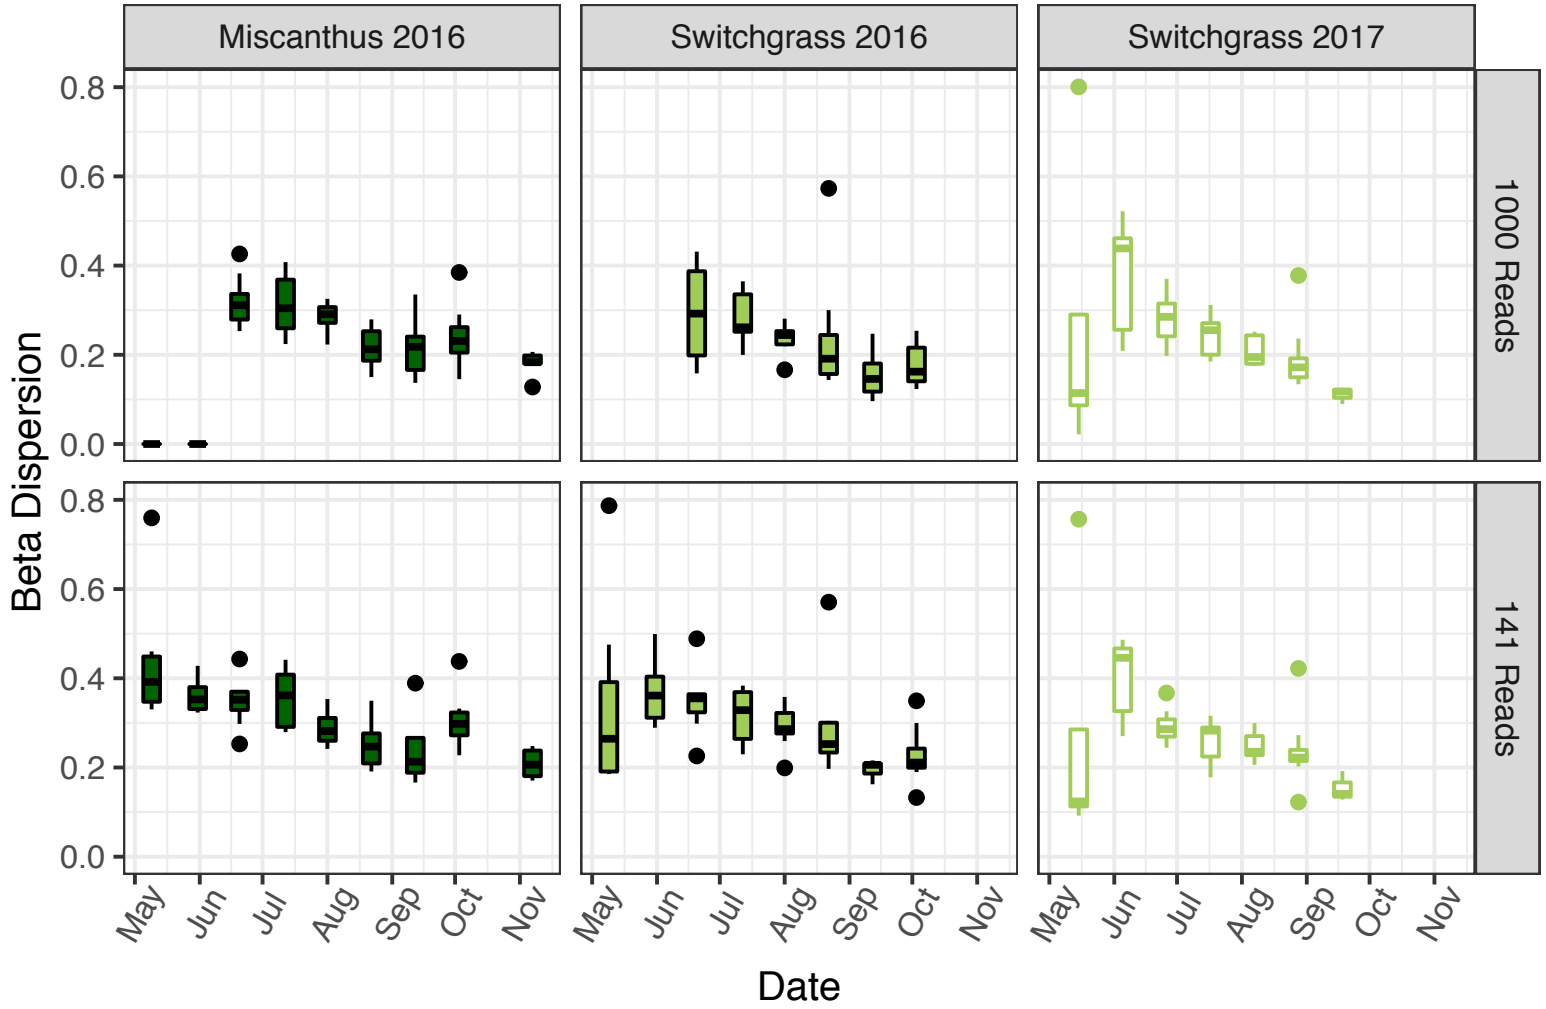

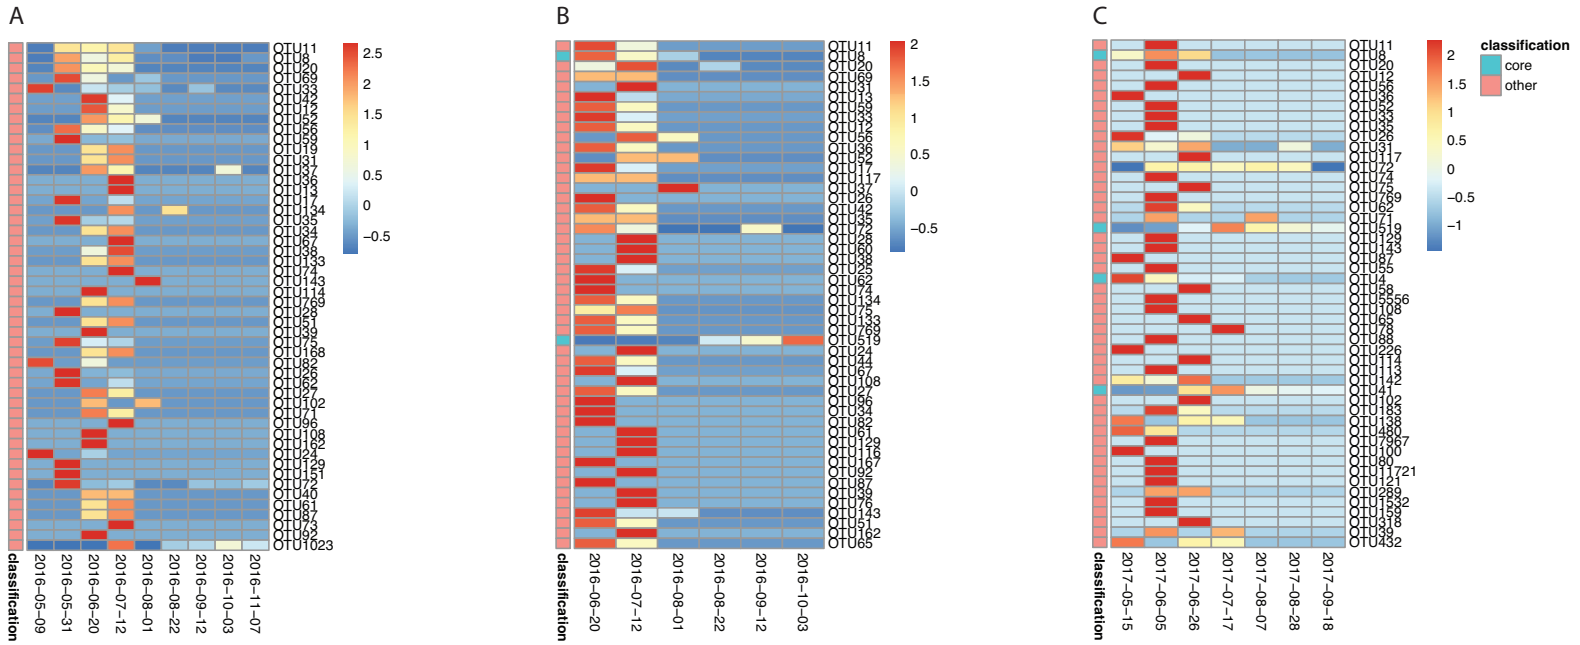

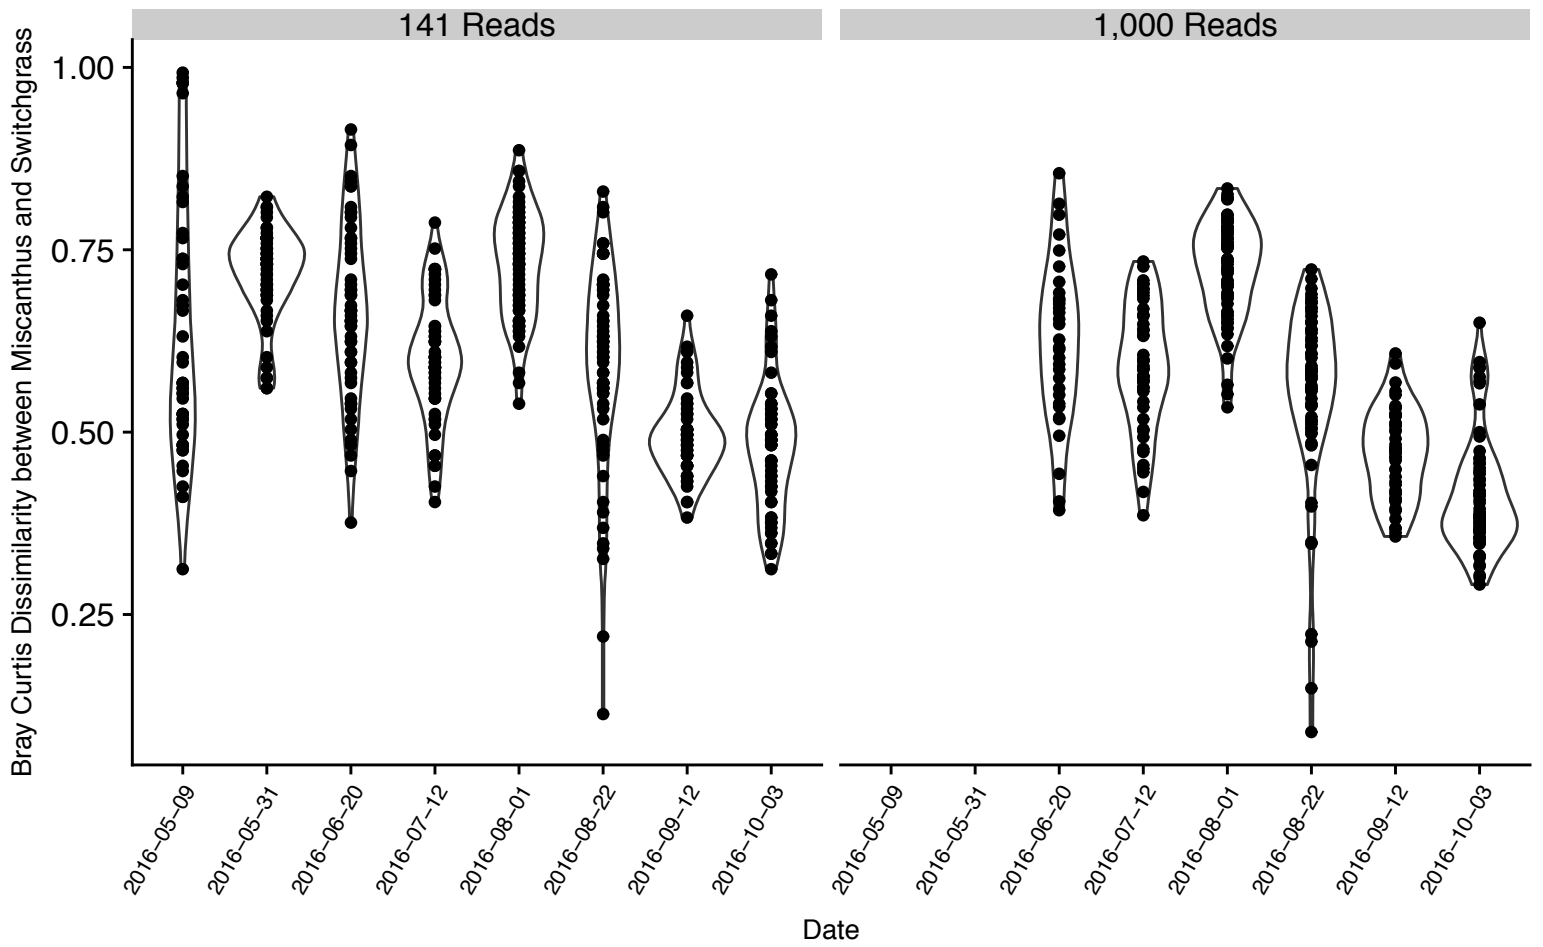

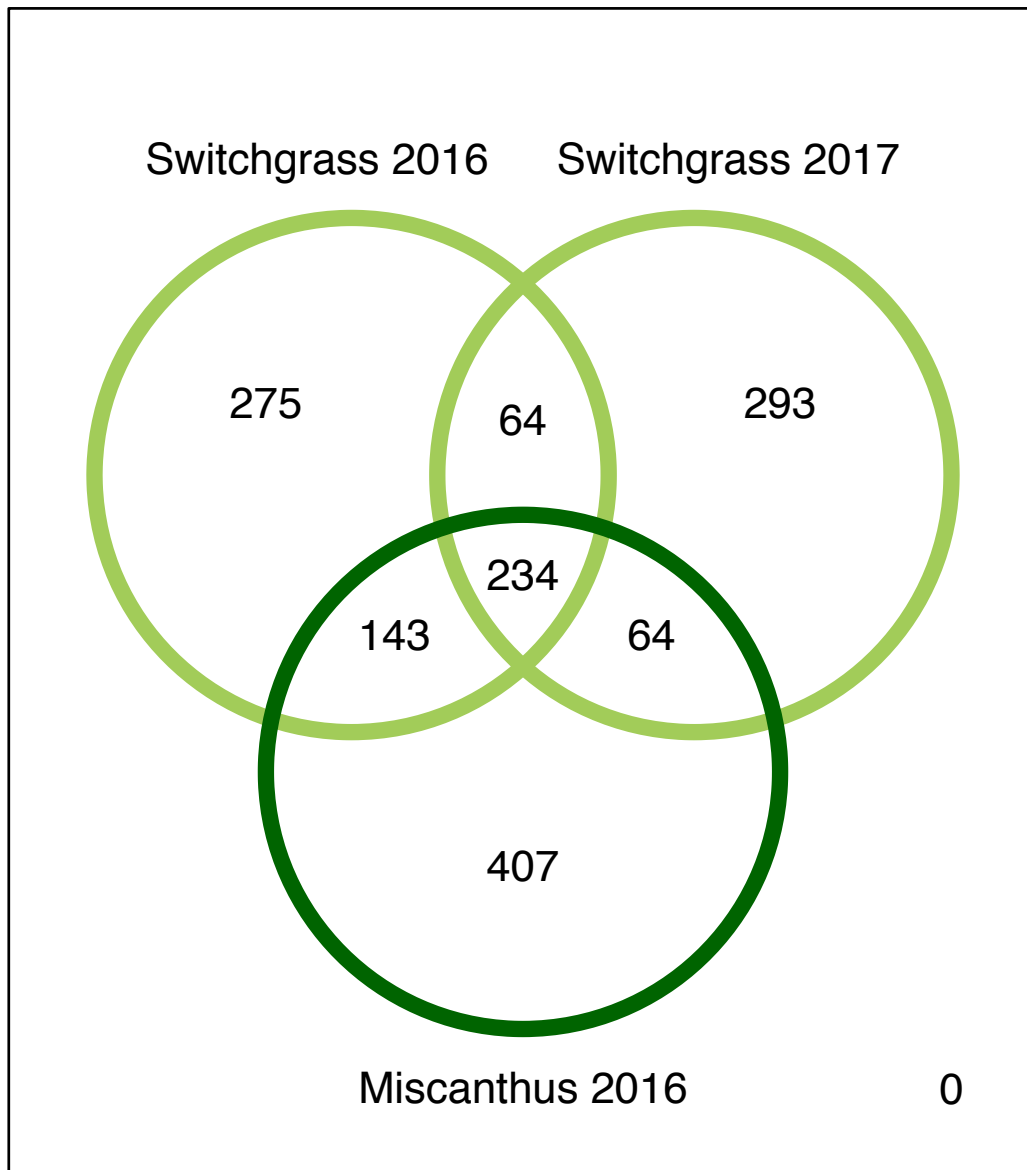

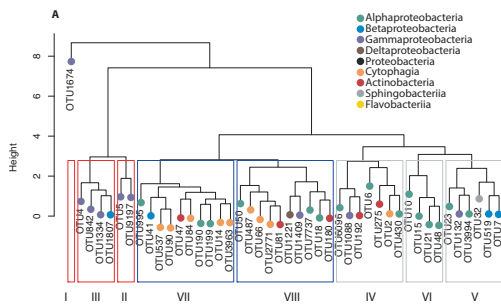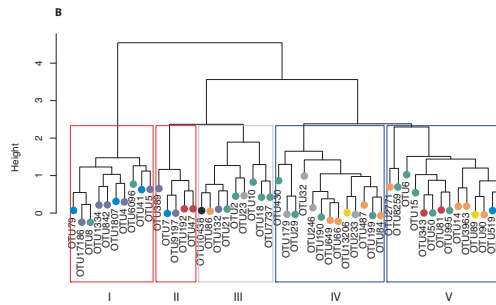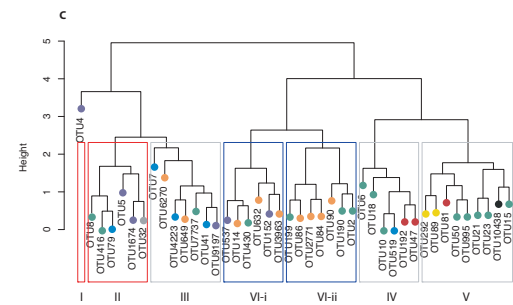

**Table S1. Sequencing summary of phyllosphere microbial communities characterized in this study, categorized by crop and year. QC is quality controlled.**

|                                         | Miscanthus<br>2016 | Switchgrass<br>2016 | Switchgrass<br>2017 |
|-----------------------------------------|--------------------|---------------------|---------------------|
| Raw Read Pairs                          | 7336923            | 7120682             | 9271169             |
| QC Reads                                | 7142900            | 6883631             | 7123783             |
| % Chloroplast/ Mitochondria of QC Reads | 77.27%             | 67.16%              | 12.32%              |
| Samples >= 141 Reads                    | 65                 | 62                  | 44                  |
| Samples >= 1,000 Reads                  | 53                 | 43                  | 44                  |
| Samples >= 10,000 Reads                 | 36                 | 27                  | 44                  |
| OTUs (rarefied to 141 Reads)            | 540                | 685                 | 232                 |
| OTUs (rarefied to 1,000 Reads)          | 1010               | 859                 | 769                 |
| OTUs (rarefied to 10,000 Reads)         | 1121               | 896                 | 2320                |



**Table S2. Comparison of overarching patterns of beta diversity across the same dataset**

**rarefied to different sequencing depths.** We compared all pairs of 141, 500, 1000, 5000, or 10000 reads per sample. All tests were significant at  $p < 0.001$  on 1000 permutations.

|             | 141 Reads | 500 Reads | 1000 Reads | 5000 Reads |
|-------------|-----------|-----------|------------|------------|
| 500 Reads   | 0.932     |           |            |            |
| 1000 Reads  | 0.872     | 0.982     |            |            |
| 5000 Reads  | 0.752     | 0.931     | 0.976      |            |
| 10000 Reads | 0.725     | 0.916     | 0.967      | 0.999      |

**Table S3.** Fitted environmental variables that explain changes in microbiome community

structure. All are  $p < 0.05$  unless designated as not significant (NS). Values in bold (EnvFit  $R^2 > 0.40$ ) were plotted as vectors in **Figure 2**.

| Variable Tested         | Axis 1 | Axis 2 | R squared | P -value |
|-------------------------|--------|--------|-----------|----------|
| precipitation           | -0.127 | 0.146  | 0.038     | 0.703    |
| Air_temp_mean           | -0.298 | -0.078 | 0.095     | 0.384    |
| air_temp_max            | -0.212 | -0.056 | 0.048     | 0.633    |
| Air_Temp_Min            | -0.242 | 0.139  | 0.078     | 0.439    |
| Air_Pressure            | -0.022 | 0.217  | 0.048     | 0.653    |
| RH                      | 0.474  | 0.444  | 0.422     | 0.008    |
| AH                      | -0.081 | 0.102  | 0.017     | 0.834    |
| Wind_Speed_Mean         | -0.703 | -0.213 | 0.539     | 0.001    |
| Solar_Radiation         | -0.258 | -0.368 | 0.202     | 0.118    |
| PAR                     | -0.300 | -0.288 | 0.173     | 0.162    |
| soil_temp_5_cm_bare_avg | -0.408 | -0.061 | 0.170     | 0.163    |
| Week                    | 0.730  | 0.356  | 0.659     | 0.001    |
| LDMC_mg_per_g           | 0.418  | 0.177  | 0.206     | 0.001    |
| nitrogen_percent        | -0.392 | -0.416 | 0.327     | 0.001    |
| carbon_percent          | 0.345  | 0.038  | 0.121     | 0.001    |
| carbon_per_nitrogen     | 0.274  | 0.134  | 0.093     | 0.003    |
| height_mean_cm          | 0.730  | -0.230 | 0.586     | 0.001    |
| pH                      | -0.027 | 0.219  | 0.049     | 0.047    |
| P_ppm                   | -0.120 | -0.097 | 0.024     | 0.187    |
| K_ppm                   | -0.445 | 0.187  | 0.233     | 0.001    |
| Ca_ppm                  | 0.047  | 0.059  | 0.006     | 0.659    |
| Mg_ppm                  | -0.366 | -0.125 | 0.149     | 0.001    |
| organic_matter          | -0.348 | -0.036 | 0.123     | 0.001    |
| NO3N_ppm                | 0.003  | -0.080 | 0.006     | 0.646    |
| NH4_ppm                 | -0.461 | 0.090  | 0.220     | 0.001    |
| soil_moisture_percent   | 0.609  | 0.015  | 0.371     | 0.001    |
| soil_temp_10cm          | -0.364 | -0.028 | 0.133     | 0.001    |
